# Supplementary material for: A single synonymous nucleotide change impacts the male-killing phenotype of prophage WO gene wmk
Source: eLife. 2021 Oct 22;10:e67686. doi: 10.7554/eLife.67686 (PMC8555981; doi:10.7554/eLife.67686)
Supplement: Figure 2—figure supplement 1—source data 1. [file elife-67686-fig2-figsupp1-data1.xlsx]

## Sheet: Sheet1
Figure 2- figure supplement 1: Sex ratios alternative start codons
Graphed:
WT	Control gene	wMel wmk	5' wRec wmk	5' wSuzi wmk	WT	Control gene	wMel wmk	5' wRec wmk	5' wSuzi wmk
1	0.862069	0.608696	1.09677	1	0.95	0.882353	0.882353	1.125	0.783784
0.888889	1.08333	0.764706	1.4	0.846154	1	0.928571	1.35714	1.40909	0.875
0.736842	1.28	0.710526	1.1875	0.8	1.13636	1.1	1.05	1.03448	0.967742
0.85	0.875	0.733333	1.125	0.913043	0.833333	1.25	0.933333	1.2	1
	0.909091	0.585366		1.17857		0.823529	1.13043		0.833333
1	0.882353	0.571429	0.888889	1.21053	1.18182	0.826087	1.33333	1.04	1.12
1.23529	1.03571	0.666667	1.14286	0.636364	0.785714	1.13043	0.8	0.911765	0.8125
1.18182	1.22727	0.684211	1.3	0.928571	1.16	1.2	1	1.15	0.730769
1.07692	0.7	0.409091	1	0.833333	1.03846	1.19048	0.909091	1.31579	0.928571
0.818182	0.842105	0.588235		0.956522	1.04167	0.769231	0.947368		0.96
0.8125	0.769231	0.6875	0.71875	0.84	1.14286	0.764706	1.12	1	0.857143
1.16129	1.13636	0.56	1.03571	1.28571	1.23529	0.809524	0.909091	0.88	0.909091
1.06667	1.17391	0.555556	0.9	0.666667	0.8	0.863636	0.882353	0.888889	1.57895
0.84	0.793103		0.85	1.4	0.862069	1.16667		0.956522	0.884615
0.875	0.894737		1.14286		0.793103	1.36364		1.20833
0.894737	1.28571		0.6875		1	1.36842		1.2
1	1.16667		0.625		1	1		1.375
			0.8					1.13636
Raw Data
	wMel wmk
Vial	Act M	Act F	CyO M	CyO F	Act M/F	CyO M/F
1	14	23	15	17	0.608696	0.882353
2	13	17	19	14	0.764706	1.35714
3	27	38	21	20	0.710526	1.05
4	22	30	14	15	0.733333	0.933333
5	24	41	26	23	0.585366	1.13043
6	12	21	32	24	0.571429	1.33333
7	16	24	12	15	0.666667	0.8
8	13	19	25	25	0.684211	1
9	9	22	20	22	0.409091	0.909091
10	10	17	18	19	0.588235	0.947368
11	11	16	28	25	0.6875	1.12
12	14	25	30	33	0.56	0.909091
13	10	18	15	17	0.555556	0.882353
	Control Gene
Vial	Act M	Act F	CyO M	CyO F	Act M/F	CyO M/F
1	25	29	15	17	0.862069	0.882353
2	26	24	26	28	1.08333	0.928571
3	32	25	33	30	1.28	1.1
4	14	16	25	20	0.875	1.25
5	10	11	14	17	0.909091	0.823529
6	15	17	19	23	0.882353	0.826087
7	29	28	26	23	1.03571	1.13043
8	27	22	24	20	1.22727	1.2
9	14	20	25	21	0.7	1.19048
10	16	19	20	26	0.842105	0.769231
11	20	26	13	17	0.769231	0.764706
12	25	22	17	21	1.13636	0.809524
13	27	23	19	22	1.17391	0.863636
14	23	29	14	12	0.793103	1.16667
15	17	19	15	11	0.894737	1.36364
16	18	14	26	19	1.28571	1.36842
17	28	24	22	22	1.16667	1
	WT
Vial	Act M	Act F	CyO M	CyO F	Act M/F	CyO M/F
1	12	12	19	20	1	0.95
2	16	18	26	26	0.888889	1
3	14	19	25	22	0.736842	1.13636
4	17	20	15	18	0.85	0.833333
5	18	16	14	12	1.125	1.16667
6	19	19	13	11	1	1.18182
7	21	17	11	14	1.23529	0.785714
8	26	22	29	25	1.18182	1.16
9	28	26	27	26	1.07692	1.03846
10	27	33	25	24	0.818182	1.04167
11	26	32	32	28	0.8125	1.14286
12	36	31	21	17	1.16129	1.23529
13	32	30	12	15	1.06667	0.8
14	21	25	25	29	0.84	0.862069
15	14	16	23	29	0.875	0.793103
16	17	19	32	32	0.894737	1
17	19	19	15	15	1	1
	5' wRec wmk
Vial	Act M	Act F	CyO M	CyO F	Act M/F	CyO M/F
1	34	31	27	24	1.09677	1.125
2	42	30	31	22	1.4	1.40909
3	19	16	30	29	1.1875	1.03448
4	27	24	30	25	1.125	1.2
5
6	16	18	26	25	0.888889	1.04
7	16	14	31	34	1.14286	0.911765
8	13	10	23	20	1.3	1.15
9	23	23	25	19	1	1.31579
10
11	23	32	26	26	0.71875	1
12	29	28	22	25	1.03571	0.88
13	18	20	16	18	0.9	0.888889
14	17	20	22	23	0.85	0.956522
15	24	21	29	24	1.14286	1.20833
16	11	16	24	20	0.6875	1.2
17	15	24	22	16	0.625	1.375
18	20	25	25	22	0.8	1.13636
	Act x 5' wSuzi
Vial	Act M	Act F	CyO M	CyO F	Act M/F	CyO M/F
1	23	23	29	37	1	0.783784
2	33	39	28	32	0.846154	0.875
3	24	30	30	31	0.8	0.967742
4	21	23	32	32	0.913043	1
5	33	28	25	30	1.17857	0.833333
6	23	19	28	25	1.21053	1.12
7	21	33	26	32	0.636364	0.8125
8	13	14	19	26	0.928571	0.730769
9	5	6	13	14	0.833333	0.928571
10	22	23	24	25	0.956522	0.96
11	21	25	24	28	0.84	0.857143
12	18	14	20	22	1.28571	0.909091
13	20	30	30	19	0.666667	1.57895
14	14	10	23	26	1.4	0.884615
