# Supplementary material for: A single synonymous nucleotide change impacts the male-killing phenotype of prophage WO gene wmk
Source: eLife. 2021 Oct 22;10:e67686. doi: 10.7554/eLife.67686 (PMC8555981; doi:10.7554/eLife.67686)
Supplement: Figure 2—figure supplement 1—source data 2. [file elife-67686-fig2-figsupp1-data2.xlsx]

## Sheet: Sheet1
Figure 2- Figure supplement 1: Sex ratios of transgenes with 5' alternative start codon: Statistical output of Kruskal-Wallis test
Number of families	1
Number of comparisons per family	15
Alpha	0.05
Dunn's multiple comparisons test	Mean rank diff.	Significant?	Summary	Adjusted P Value
WT vs. Control gene	-2.535	No	ns	>0.9999	A-B
WT vs. wmk	42.71	Yes	***	0.0002	A-C
WT vs. 5' wRec wmk	-2	No	ns	>0.9999	A-D
WT vs. 5' wSuzi wmk	2.121	No	ns	>0.9999	A-E
WT vs. 5' wSuzi wmk	4.763	No	ns	>0.9999	A-J
Control gene vs. wmk	45.25	Yes	****	<0.0001	B-C
Control gene vs. 5' wRec wmk	0.5349	No	ns	>0.9999	B-D
Control gene vs. 5' wSuzi wmk	4.655	No	ns	>0.9999	B-E
Control gene vs. 5' wSuzi wmk	7.298	No	ns	>0.9999	B-J
wmk vs. 5' wRec wmk	-44.71	Yes	****	<0.0001	C-D
wmk vs. 5' wSuzi wmk	-40.59	Yes	***	0.0008	C-E
wmk vs. 5' wSuzi wmk	-37.95	Yes	**	0.0024	C-J
5' wRec wmk vs. 5' wSuzi wmk	4.121	No	ns	>0.9999	D-E
5' wRec wmk vs. 5' wSuzi wmk	6.763	No	ns	>0.9999	D-J
5' wSuzi wmk vs. 5' wSuzi wmk	2.643	No	ns	>0.9999	E-J
Test details	Mean rank 1	Mean rank 2	Mean rank diff.	n1	n2	Z
WT vs. Control gene	51.91	54.44	-2.535	16	17	0.2786
WT vs. wmk	51.91	9.192	42.71	16	13	4.38
WT vs. 5' wRec wmk	51.91	53.91	-2	16	16	0.2166
WT vs. 5' wSuzi wmk	51.91	49.79	2.121	16	14	0.2218
WT vs. 5' wSuzi wmk	51.91	47.14	4.763	16	14	0.4983
Control gene vs. wmk	54.44	9.192	45.25	17	13	4.702
Control gene vs. 5' wRec wmk	54.44	53.91	0.5349	17	16	0.0588
Control gene vs. 5' wSuzi wmk	54.44	49.79	4.655	17	14	0.4939
Control gene vs. 5' wSuzi wmk	54.44	47.14	7.298	17	14	0.7742
wmk vs. 5' wRec wmk	9.192	53.91	-44.71	13	16	4.585
wmk vs. 5' wSuzi wmk	9.192	49.79	-40.59	13	14	4.035
wmk vs. 5' wSuzi wmk	9.192	47.14	-37.95	13	14	3.772
5' wRec wmk vs. 5' wSuzi wmk	53.91	49.79	4.121	16	14	0.4311
5' wRec wmk vs. 5' wSuzi wmk	53.91	47.14	6.763	16	14	0.7076
5' wSuzi wmk vs. 5' wSuzi wmk	49.79	47.14	2.643	14	14	0.2677
