# Supplementary material for: A single synonymous nucleotide change impacts the male-killing phenotype of prophage WO gene wmk
Source: eLife. 2021 Oct 22;10:e67686. doi: 10.7554/eLife.67686 (PMC8555981; doi:10.7554/eLife.67686)
Supplement: Figure 2—source data 1. [file elife-67686-fig2-data1.xlsx]

## Sheet: Sheet1
Figure 2B: Sex ratios of closely-related homologs
Graphed Data:
Expressing							Non-Expressing
WT	Control gene	wMel wmk	HA-wmk	wSuzi wmk	wRec wmk		WT	Control gene	wMel wmk	HA-wmk	wSuzi wmk	wRec wmk
0.90625	1.26923	0.405405	0.40625				1	0.793103	1.10714	1.5	1.12903	0.814815
1.16667	1.23684	0.645161	0.685714				1.08571	1.08696	1	0.833333	1.03226	0.941176
1.13793	0.952381	0.952381	0.857143				0.818182	0.904762	1.38462	1.05882	0.673469	0.869565
0.878049	1	0.485714	0.75				1	1.13158	0.84	1.42857	1.08824	1.125
0.964286	1	0.875	0.9				1	0.793103	1.35294	0.954545	1.10256	1
0.880952	1.24138	0.782609	0.344828				0.947368	0.833333	1.04545	1.06667	1.24138	0.978723
1.2	1.23333	0.863636	0.625				1.13043	0.875	1.14286	0.875	1.27027	0.827586
1.13793	0.918919	0.5	0.742857				1.02174	0.931034	1	1.15789	1.025	1.19444
1.41667	0.965517	0.444444	0.684211				0.884615	0.925926	1.05714	1.06667	0.842105	1.03636
0.761905	0.820513	0.75	0.666667				1.3913	0.72	0.923077	1.5	0.888889
0.871795	0.930233	0.92	0.68				1.40909	0.766667	1.14286	1.23077	1.09091	1.10811
1.24	1.31579		0.55				0.9	0.806452		1		0.947368
1.31818	0.916667	0.606061	0.785714				1.04	1.34783	0.875	1.21429	0.804878	0.806452
0.833333	0.925	0.6875	0.791667				1.1	1.125	1	1.63636	0.837838	1.125
0.7	0.9	0.833333	0.689655				0.807692	0.884615	0.75	1.1	0.964286	0.907407
1	0.842105	0.52	0.47619				0.95	0.848485	0.722222	1.125	0.833333	0.894737
1.08696	1.07407	0.416667	0.617647				1.64286	1.125	1.05	0.76	1.16216	0.947368
0.923077	1.125	0.357143	0.73913				0.857143	1.22222	1.4	0.95	0.857143	1.11905
1.10256	1.16667	0.777778					1.25926	1.29167	0.72
1.42308		0.65					0.857143		1.08333		1.06667	0.666667
Raw Data:
	wMel wmk
Vial	Act M	Act F	CyO M	CyO F	sum	Act M/F	CyO M/F
1	15	37	31	28	111	0.405405	1.10714
2	20	31	22	22	95	0.645161	1
3	20	21	18	13	72	0.952381	1.38462
4	17	35	21	25	98	0.485714	0.84
5	14	16	23	17	70	0.875	1.35294
6	18	23	23	22	86	0.782609	1.04545
7	19	22	16	14	71	0.863636	1.14286
8	12	24	21	21	78	0.5	1
9	12	27	37	35	111	0.444444	1.05714
10	15	20	24	26	85	0.75	0.923077
11	23	25	24	21	93	0.92	1.14286
12	8	11	7	7	33
13	20	33	21	24	98	0.606061	0.875
14	22	32	13	13	80	0.6875	1
15	15	18	12	16	61	0.833333	0.75
16	13	25	13	18	69	0.52	0.722222
17	10	24	21	20	75	0.416667	1.05
18	10	28	28	20	86	0.357143	1.4
19	14	18	18	25	75	0.777778	0.72
20	13	20	26	24	83	0.65	1.08333
	Control Gene
Vial	Act M	Act F	CyO M	CyO F	sum	Act M/F	CyO M/F
1	33	26	23	29	111	1.26923	0.793103
2	47	38	25	23	133	1.23684	1.08696
3	40	42	19	21	122	0.952381	0.904762
4	38	38	43	38	157	1	1.13158
5	24	24	23	29	100	1	0.793103
6	36	29	20	24	109	1.24138	0.833333
7	37	30	28	32	127	1.23333	0.875
8	34	37	27	29	127	0.918919	0.931034
9	28	29	25	27	109	0.965517	0.925926
10	32	39	18	25	114	0.820513	0.72
11	40	43	23	30	136	0.930233	0.766667
12	25	19	25	31	100	1.31579	0.806452
13	33	36	31	23	123	0.916667	1.34783
14	37	40	18	16	111	0.925	1.125
15	36	40	23	26	125	0.9	0.884615
16	32	38	28	33	131	0.842105	0.848485
17	29	27	27	24	107	1.07407	1.125
18	36	32	22	18	108	1.125	1.22222
19	35	30	31	24	120	1.16667	1.29167
	WT
Vial	Act M	Act F	CyO M	CyO F	sum	Act M/F	CyO M/F
1	29	32	29	29	119	0.90625	1
2	35	30	38	35	138	1.16667	1.08571
3	33	29	18	22	102	1.13793	0.818182
4	36	41	27	27	131	0.878049	1
5	27	28	30	30	115	0.964286	1
6	37	42	36	38	153	0.880952	0.947368
7	30	25	26	23	104	1.2	1.13043
8	33	29	47	46	155	1.13793	1.02174
9	34	24	23	26	107	1.41667	0.884615
10	32	42	32	23	129	0.761905	1.3913
11	34	39	31	22	126	0.871795	1.40909
12	31	25	18	20	94	1.24	0.9
13	29	22	26	25	102	1.31818	1.04
14	25	30	11	10	76	0.833333	1.1
15	21	30	21	26	98	0.7	0.807692
16	26	26	19	20	91	1	0.95
17	25	23	23	14	85	1.08696	1.64286
18	12	13	12	14	51	0.923077	0.857143
19	43	39	34	27	143	1.10256	1.25926
20	37	26	30	35	128	1.42308	0.857143
	HA-wmk
Vial	Act M	Act F	CyO M	CyO F	sum	Act M/F	CyO M/F
1	13	32	21	14	80	0.40625	1.5
2	24	35	15	18	92	0.685714	0.833333
3	18	21	18	17	74	0.857143	1.05882
4	21	28	20	14	83	0.75	1.42857
5	18	20	21	22	81	0.9	0.954545
6	10	29	16	15	70	0.344828	1.06667
7	15	24	14	16	69	0.625	0.875
8	26	35	22	19	102	0.742857	1.15789
9	13	19	16	15	63	0.684211	1.06667
10	10	15	18	12	55	0.666667	1.5
11	17	25	16	13	71	0.68	1.23077
12	11	20	16	16	63	0.55	1
13	22	28	17	14	81	0.785714	1.21429
14	19	24	18	11	72	0.791667	1.63636
15	20	29	22	20	91	0.689655	1.1
16	10	21	18	16	65	0.47619	1.125
17	21	34	19	25	99	0.617647	0.76
18	17	23	19	20	79	0.73913	0.95
19
20
	wRec wmk
Vial	Act M	Act F	CyO M	CyO F	sum	Act M/F	CyO M/F
1			44	54	98	#DIV/0!	0.814815
2			16	17	33	#DIV/0!	0.941176
3			20	23	43	#DIV/0!	0.869565
4			27	24	51	#DIV/0!	1.125
5			28	28	56	#DIV/0!	1
6			46	47	93	#DIV/0!	0.978723
7			24	29	53	#DIV/0!	0.827586
8			43	36	79	#DIV/0!	1.19444
9			57	55	112	#DIV/0!	1.03636
10			12	12	24	#DIV/0!
11			41	37	78	#DIV/0!	1.10811
12			18	19	37	#DIV/0!	0.947368
13			25	31	56	#DIV/0!	0.806452
14			36	32	68	#DIV/0!	1.125
15			49	54	103	#DIV/0!	0.907407
16			34	38	72	#DIV/0!	0.894737
17			54	57	111	#DIV/0!	0.947368
18			47	42	89	#DIV/0!	1.11905
19			6	9	15	#DIV/0!
20			10	15	25	#DIV/0!	0.666667
	wSuzi wmk
Vial	Act M	Act F	CyO M	CyO F	sum	Act M/F	CyO M/F
1			35	31	66	#DIV/0!	1.12903
2			32	31	63	#DIV/0!	1.03226
3			33	49	82	#DIV/0!	0.673469
4			37	34	71	#DIV/0!	1.08824
5			43	39	82	#DIV/0!	1.10256
6			36	29	65	#DIV/0!	1.24138
7			47	37	84	#DIV/0!	1.27027
8			41	40	81	#DIV/0!	1.025
9			32	38	70	#DIV/0!	0.842105
10			32	36	68	#DIV/0!	0.888889
11			36	33	69	#DIV/0!	1.09091
12			5	8	13	#DIV/0!
13			33	41	74	#DIV/0!	0.804878
14			31	37	68	#DIV/0!	0.837838
15			27	28	55	#DIV/0!	0.964286
16			25	30	55	#DIV/0!	0.833333
17			43	37	80	#DIV/0!	1.16216
18			24	28	52	#DIV/0!	0.857143
19			1	5	6	#DIV/0!
20			32	30	62	#DIV/0!	1.06667
