# Supplementary material for: A single synonymous nucleotide change impacts the male-killing phenotype of prophage WO gene wmk
Source: eLife. 2021 Oct 22;10:e67686. doi: 10.7554/eLife.67686 (PMC8555981; doi:10.7554/eLife.67686)
Supplement: Figure 2—source data 2. [file elife-67686-fig2-data2.xlsx]

## Sheet: Sheet1
Figure 2B: Sex ratios of closely-related homologs: Statistical output of Kruskal-Wallis test
Number of families	1
Number of comparisons per family	15
Alpha	0.05
Dunn's multiple comparisons test	Mean rank diff.	Significant?	Summary	Adjusted P Value
WT vs. Control gene	-1.784	No	ns	>0.9999	A-B
WT vs. wmk	33.06	Yes	*	0.0185	A-C
WT vs. HA-wmk	34.12	Yes	*	0.0151	A-D
WT vs. wSuzi	71.9	Yes	****	<0.0001	A-E
WT vs. wRec	71.9	Yes	****	<0.0001	A-F
Control gene vs. wmk	34.84	Yes	*	0.0116	B-C
Control gene vs. HA-wmk	35.91	Yes	**	0.0094	B-D
Control gene vs. wSuzi	73.68	Yes	****	<0.0001	B-E
Control gene vs. wRec	73.68	Yes	****	<0.0001	B-F
wmk vs. HA-wmk	1.064	No	ns	>0.9999	C-D
wmk vs. wSuzi	38.84	Yes	**	0.0033	C-E
wmk vs. wRec	38.84	Yes	**	0.0033	C-F
HA-wmk vs. wSuzi	37.78	Yes	**	0.0058	D-E
HA-wmk vs. wRec	37.78	Yes	**	0.0058	D-F
wSuzi vs. wRec	0	No	ns	>0.9999	E-F
Test details	Mean rank 1	Mean rank 2	Mean rank diff.	n1	n2	Z
WT vs. Control gene	90.4	92.18	-1.784	20	19	0.1744
WT vs. wmk	90.4	57.34	33.06	20	19	3.232
WT vs. HA-wmk	90.4	56.28	34.12	20	18	3.289
WT vs. wSuzi	90.4	18.5	71.9	20	18	6.931
WT vs. wRec	90.4	18.5	71.9	20	18	6.931
Control gene vs. wmk	92.18	57.34	34.84	19	19	3.363
Control gene vs. HA-wmk	92.18	56.28	35.91	19	18	3.419
Control gene vs. wSuzi	92.18	18.5	73.68	19	18	7.016
Control gene vs. wRec	92.18	18.5	73.68	19	18	7.016
wmk vs. HA-wmk	57.34	56.28	1.064	19	18	0.1013
wmk vs. wSuzi	57.34	18.5	38.84	19	18	3.698
wmk vs. wRec	57.34	18.5	38.84	19	18	3.698
HA-wmk vs. wSuzi	56.28	18.5	37.78	18	18	3.549
HA-wmk vs. wRec	56.28	18.5	37.78	18	18	3.549
wSuzi vs. wRec	18.5	18.5	0	18	18	0
