# Supplementary material for: A single synonymous nucleotide change impacts the male-killing phenotype of prophage WO gene wmk
Source: eLife. 2021 Oct 22;10:e67686. doi: 10.7554/eLife.67686 (PMC8555981; doi:10.7554/eLife.67686)
Supplement: Figure 2—source data 3. [file elife-67686-fig2-data3.xlsx]

## Sheet: Sheet1
Figure 2C: Closely-related transgene qPCR
Graphed:
wSuzi wmk	wRec wmk	wMel wmk	HA-wmk
0.1157	0.0954788	0.0803342	0.0846608
0.0830073	0.0897769	0.0674653	0.0922437
0.0669547	0.0979648	0.0982533	0.0542889
0.11171	0.0539173	0.0582105	0.103106
	0.0881421	0.0776717	0.0840826
	0.0937218	0.113258	0.0704235
	0.0977043	0.074159
Raw Data:
	Rp49 cq	homolog cq	2^-(deltaCt)
wSuzi wmk	16.9528	20.0643	0.1157
	18.3576	21.9482	0.0830073
	13.8574	19.7618	0.0166955
	14.9986	18.1608	0.111709
wRec wmk	13.9335	17.3222	0.0954788
	13.8958	17.3733	0.0897769
	13.8535	17.2051	0.0979648
	15.01	19.2231	0.0539173
	14.8466	20.5786	0.0188142
	13.5175	16.933	0.0937218
	13.4346	16.79	0.0977043
wMel wmk	14.0307	17.6685	0.0803342
	13.6474	17.5371	0.0674653
	15.6546	19.002	0.0982533
	13.4049	17.5075	0.0582105
	14.2741	17.9606	0.0776717
	14.009	17.1514	0.113258
	13.3971	17.1504	0.074159
HA-wmk	12.6803	16.2425	0.0846608
	13.8772	17.3156	0.0922437
	14.0525	18.2557	0.0542889
	13.3815	16.6593	0.103106
	14.1955	17.7675	0.0840826
	13.3707	17.1985	0.0704235
