# Supplementary material for: A single synonymous nucleotide change impacts the male-killing phenotype of prophage WO gene wmk
Source: eLife. 2021 Oct 22;10:e67686. doi: 10.7554/eLife.67686 (PMC8555981; doi:10.7554/eLife.67686)
Supplement: Figure 2—source data 4. [file elife-67686-fig2-data4.xlsx]

## Sheet: Sheet1
Figure 2C: qPCR for closely related transgene expression: Statistical output of Kruskal-Wallis test
Number of families	1
Number of comparisons per family	6
Alpha	0.05
Dunn's multiple comparisons test	Mean rank diff.	Significant?	Summary	Adjusted P Value
wSuzi vs. wRec	1	No	ns	>0.9999	A-B
wSuzi vs. wmk	4.286	No	ns	>0.9999	A-C
wSuzi vs. HA-wmk	3.833	No	ns	>0.9999	A-D
wRec vs. wmk	3.286	No	ns	>0.9999	B-C
wRec vs. HA-wmk	2.833	No	ns	>0.9999	B-D
wmk vs. HA-wmk	-0.4524	No	ns	>0.9999	C-D
Test details	Mean rank 1	Mean rank 2	Mean rank diff.	n1	n2	Z
wSuzi vs. wRec	15	14	1	4	7	0.2256
wSuzi vs. wmk	15	10.71	4.286	4	7	0.967
wSuzi vs. HA-wmk	15	11.17	3.833	4	6	0.8398
wRec vs. wmk	14	10.71	3.286	7	7	0.8693
wRec vs. HA-wmk	14	11.17	2.833	7	6	0.7202
wmk vs. HA-wmk	10.71	11.17	-0.4524	7	6	0.115
