# Supplementary material for: A single synonymous nucleotide change impacts the male-killing phenotype of prophage WO gene wmk
Source: eLife. 2021 Oct 22;10:e67686. doi: 10.7554/eLife.67686 (PMC8555981; doi:10.7554/eLife.67686)
Supplement: Figure 2—source data 5. [file elife-67686-fig2-data5.xlsx]

## Sheet: Sheet1
Figure 2D: qPCR msl-2 expression
Graphed:
wMel wmk	wSuzi wmk	wBif wmk
0.00018271	0.00031955	0.00102557
0.00173035	0.00023415	0.00196005
0.00030998	0.00151744	0.00066949
0.00126601	0.00032271	0.00055211
0.00057716	0.00119059	0.00084746
0.00739817	0.00091937	0.00016436
0.00074767	0.00035999	0.00180672
0.00063943	0.00105477	0.00114981
0.00022605	0.00058095	0.00095418
0.00110484	0.00018769	0.00059394
0.0106416
Raw Data:
	Rp49 cq	msl-2 cq	2^-(deltaCt)
wMel wmk	18.1114	30.5296	0.000182712
	16.3903	25.565	0.00173035
	20.0195	31.6751	0.000309978
	25.0634	34.6889	0.00126601
	23.2889	34.0477	0.000577163
	18.7042	25.7828	0.00739817
	16.9783	27.3636	0.000747674
	21.0634	31.6743	0.00063943
	22.6667	34.7778	0.000226047
	25.256	35.0779	0.00110484
	27.6228	34.1769	0.0106416
wSuzi wmk	18.5552	30.1668	0.000319552
	18.1418	30.2021	0.000234146
	16.6331	25.9973	0.00151744
	21.234	32.8314	0.000322708
	20.9849	30.699	0.00119059
	23.4159	33.503	0.000919371
	23.7689	35.2087	0.000359989
	17.2049	27.0938	0.00105477
	20.2401	30.9894	0.000580946
	15.559	27.9384	0.000187693
wBif wmk	25.3826	35.3119	0.00102557
	23.1348	32.1297	0.00196005
	21.9836	32.5283	0.000669495
	19.5116	30.3344	0.000552109
	21.4652	31.6698	0.000847464
	19.3689	31.9397	0.000164364
	23.3434	32.4559	0.00180672
	23.0125	32.7769	0.00114981
	23.6627	33.6961	0.000954184
	23.0855	33.8029	0.000593943
