# Supplementary material for: A single synonymous nucleotide change impacts the male-killing phenotype of prophage WO gene wmk
Source: eLife. 2021 Oct 22;10:e67686. doi: 10.7554/eLife.67686 (PMC8555981; doi:10.7554/eLife.67686)
Supplement: Figure 2—source data 6. [file elife-67686-fig2-data6.xlsx]

## Sheet: Sheet1
Figure 2D: qPCR for msl-2 expression: Statistical output of Kruskal-Wallis test
Number of families	1
Number of comparisons per family	3
Alpha	0.05
Dunn's multiple comparisons test	Mean rank diff.	Significant?	Summary	Adjusted P Value
wmk vs. wSuzi wmk	3.791	No	ns	>0.9999	A-B
wmk vs. wBif wmk	-0.4091	No	ns	>0.9999	A-C
wSuzi wmk vs. wBif wmk	-4.2	No	ns	0.9049	B-C
Test details	Mean rank 1	Mean rank 2	Mean rank diff.	n1	n2	Z
wmk vs. wSuzi wmk	17.09	13.3	3.791	11	10	0.9543
wmk vs. wBif wmk	17.09	17.5	-0.4091	11	10	0.103
wSuzi wmk vs. wBif wmk	13.3	17.5	-4.2	10	10	1.033
