# Supplementary material for: A single synonymous nucleotide change impacts the male-killing phenotype of prophage WO gene wmk
Source: eLife. 2021 Oct 22;10:e67686. doi: 10.7554/eLife.67686 (PMC8555981; doi:10.7554/eLife.67686)
Supplement: Figure 3—source data 1. [file elife-67686-fig3-data1.xlsx]

## Sheet: Sheet1
Figure 3: Sex ratios divergent homologs
Graphed:
WT	Control gene	wMel wmk	wBol1b wmk	wBif wmk	wCaub wmk	wInn/wBor wmk		WT	Control gene	wMel wmk	wBol1b wmk	wBif wmk	wCaub wmk	wInn/wBor wmk
1	1.22222	0.722222	0.794118	0.833333	0.909091	0.909091		1.2069	0.869565	0.925926	0.868421	1.2069	0.789474	1.125
1.04167	0.692308	0.5	1.375	1.11111		0.882353		1.17391	0.833333	0.75	1.08333	0.789474		1
	0.884615		0.727273	0.777778	0.933333	0.882353			0.894737		1.2	0.954545	1.1875	0.916667
0.857143	0.789474		0.833333	1.03333		0.8		0.8	1		0.578947	1		1.2
1.0625	1.03571	0.875	1.57143	1.07692	1	0.8		1	1.52941	1.26667	1.28571	0.846154	0.882353	1.5
1.13333	1.04167	0.695652	1.23529	1.04167	2	1.5		0.896552	0.722222	0.823529	1	0.769231	1.4	1.09524
0.8125	0.833333	0.722222	0.846154	1	1.2	1		1	1.05263	0.666667	1	0.933333	1.38462	1.13333
	0.73913	0.647059	0.90625	1.0625	0.823529	1.03704			1	1.0625	1.53333	1.125	0.9375	1.05882
0.769231	0.68		0.909091	1.125	1.41667	0.954545		0.666667	1.35714		1.27273	0.833333	1.23077	1.35294
0.9375	1.27273		1.09091	1.11111	0.65	1.0625		1.2	0.823529		0.555556	1.18182	0.73913	1.42857
0.916667	0.806452	0.363636	0.625	1		0.761905		1.375	0.782609	0.906977	0.857143	1.33333		0.95
0.714286	0.772727			0.931034	1.5	1.35294		1	0.933333			0.857143	0.625	1.14286
0.833333	1.08	0.619048	1.33333	1.23529		1.26316		1.07143	0.857143	0.954545	1.36364	1.36364		0.8
1.0625	1.08333	0.733333	1.92857			1		1	0.954545	0.923077	0.884615			1.4
1.11111	1	0.5	1.35		1.2	0.965517		0.818182	0.785714	1.23077	1.33333		1.71429	0.884615
1	1	0.538462	0.909091			1.33333		1.5	0.708333	0.8	0.764706			0.941176
1	0.717949	0.5	1.04348					1.18182	1	0.692308	1.36364
1.0625	1.11765							0.947368	1.14286
Raw Data:
			wMel wmk
Vials	Act M	Act F	CyO M	CyO F	sum	Act M/F	CyO M/F
1	13	18	25	27	83	0.722222	0.925926
2	5	10	18	24	57	0.5	0.75
3	12	14	10	10	46
4	5	16	12	14	47
5	14	16	19	15	64	0.875	1.26667
6	16	23	14	17	70	0.695652	0.823529
7	13	18	12	18	61	0.722222	0.666667
8	11	17	17	16	61	0.647059	1.0625
9	9	10	15	13	47
10	4	13	15	10	42
11	4	11	39	43	97	0.363636	0.906977
12	6	13	12	17	48
13	13	21	21	22	77	0.619048	0.954545
14	11	15	12	13	51	0.733333	0.923077
15	9	18	16	13	56	0.5	1.23077
16	7	13	20	25	65	0.538462	0.8
17	5	10	18	26	59	0.5	0.692308
18
19
20
			WT
Vials	Act M	Act F	CyO M	CyO F	sum	Act M/F	CyO M/F
1	16	16	35	29	96	1	1.2069
2	25	24	27	23	99	1.04167	1.17391
3	7	11	8	10	36
4	18	21	20	25	84	0.857143	0.8
5	17	16	20	20	73	1.0625	1
6	17	15	26	29	87	1.13333	0.896552
7	13	16	12	12	53	0.8125	1
8	7	11	10	13	41
9	10	13	16	24	63	0.769231	0.666667
10	15	16	18	15	64	0.9375	1.2
11	22	24	11	8	65	0.916667	1.375
12	10	14	14	14	52	0.714286	1
13	15	18	15	14	62	0.833333	1.07143
14	17	16	10	10	53	1.0625	1
15	10	9	18	22	59	1.11111	0.818182
16	16	16	15	10	57	1	1.5
17	21	21	13	11	66	1	1.18182
18	17	16	18	19	70	1.0625	0.947368
19
20
			wBol
Vials	Act M	Act F	CyO M	CyO F	sum	Act M/F	CyO M/F
1	27	34	33	38	132	0.794118	0.868421
2	33	24	26	24	107	1.375	1.08333
3	8	11	18	15	52	0.727273	1.2
4	15	18	11	19	63	0.833333	0.578947
5	22	14	18	14	68	1.57143	1.28571
6	21	17	15	15	68	1.23529	1
7	11	13	15	15	54	0.846154	1
8	29	32	23	15	99	0.90625	1.53333
9	30	33	28	22	113	0.909091	1.27273
10	12	11	10	18	51	1.09091	0.555556
11	10	16	12	14	52	0.625	0.857143
12	2	0	0	2	4
13	16	12	15	11	54	1.33333	1.36364
14	27	14	23	26	90	1.92857	0.884615
15	27	20	20	15	82	1.35	1.33333
16	10	11	13	17	51	0.909091	0.764706
17	24	23	15	11	73	1.04348	1.36364
18
19
20
			Control Gene
Vials	Act M	Act F	CyO M	CyO F	sum	Act M/F	CyO M/F
1	22	18	20	23	83	1.22222	0.869565
2	18	26	15	18	77	0.692308	0.833333
3	23	26	17	19	85	0.884615	0.894737
4	15	19	13	13	60	0.789474	1
5	29	28	26	17	100	1.03571	1.52941
6	25	24	13	18	80	1.04167	0.722222
7	20	24	20	19	83	0.833333	1.05263
8	17	23	20	20	80	0.73913	1
9	17	25	19	14	75	0.68	1.35714
10	14	11	14	17	56	1.27273	0.823529
11	25	31	18	23	97	0.806452	0.782609
12	17	22	28	30	97	0.772727	0.933333
13	27	25	12	14	78	1.08	0.857143
14	26	24	21	22	93	1.08333	0.954545
15	22	22	11	14	69	1	0.785714
16	27	27	17	24	95	1	0.708333
17	28	39	27	27	121	0.717949	1
18	19	17	16	14	66	1.11765	1.14286
19
20
			wBif
Vials	Act M	Act F	CyO M	CyO F	sum	Act M/F	CyO M/F
1	25	30	35	29	119	0.833333	1.2069
2	20	18	15	19	72	1.11111	0.789474
3	21	27	21	22	91	0.777778	0.954545
4	31	30	23	23	107	1.03333	1
5	14	13	11	13	51	1.07692	0.846154
6	25	24	20	26	95	1.04167	0.769231
7	15	15	14	15	59	1	0.933333
8	17	16	18	16	67	1.0625	1.125
9	18	16	10	12	56	1.125	0.833333
10	20	18	13	11	62	1.11111	1.18182
11	21	21	20	15	77	1	1.33333
12	27	29	12	14	82	0.931034	0.857143
13	21	17	15	11	64	1.23529	1.36364
14
15
16
17
18
19
20
			wCaub
Vials	Act M	Act F	CyO M	CyO F	sum	Act M/F	CyO M/F
1	10	11	15	19	55	0.909091	0.789474
2	11	12	12	7	42
3	14	15	19	16	64	0.933333	1.1875
4	8	13	10	10	41
5	14	14	15	17	60	1	0.882353
6	20	10	14	10	54	2	1.4
7	18	15	18	13	64	1.2	1.38462
8	14	17	15	16	62	0.823529	0.9375
9	17	12	16	13	58	1.41667	1.23077
10	13	20	17	23	73	0.65	0.73913
11	11	15	10	12	48
12	15	10	10	16	51	1.5	0.625
13	11	14	13	11	49
14	12	12	12	9	45
15	18	15	12	7	52	1.2	1.71429
16
17
18
19
20
			wInn
Vials	Act M	Act F	CyO M	CyO F	sum	Act M/F	CyO M/F
1	20	22	18	16	76	0.909091	1.125
2	15	17	16	16	64	0.882353	1
3	15	17	11	12	55	0.882353	0.916667
4	8	10	18	15	51	0.8	1.2
5	12	15	15	10	52	0.8	1.5
6	18	12	23	21	74	1.5	1.09524
7	12	12	17	15	56	1	1.13333
8	28	27	18	17	90	1.03704	1.05882
9	21	22	23	17	83	0.954545	1.35294
10	17	16	10	7	50	1.0625	1.42857
11	16	21	19	20	76	0.761905	0.95
12	23	17	24	21	85	1.35294	1.14286
13	24	19	16	20	79	1.26316	0.8
14	22	22	14	10	68	1	1.4
15	28	29	23	26	106	0.965517	0.884615
16	16	12	16	17	61	1.33333	0.941176
17
18
19
20
