# Supplementary material for: A single synonymous nucleotide change impacts the male-killing phenotype of prophage WO gene wmk
Source: eLife. 2021 Oct 22;10:e67686. doi: 10.7554/eLife.67686 (PMC8555981; doi:10.7554/eLife.67686)
Supplement: Figure 3—source data 2. [file elife-67686-fig3-data2.xlsx]

## Sheet: Sheet1
Figure 3: Sex ratios of divergent homologs: Statistical output of Kruskal-Wallis test
Number of families	1
Number of comparisons per family	21
Alpha	0.05
Dunn's multiple comparisons test	Mean rank diff.	Significant?	Summary	Adjusted P Value
WT vs. Control gene	5.063	No	ns	>0.9999	A-B
WT vs. wmk	41.73	Yes	**	0.004	A-C
WT vs. wBol1b	-7.406	No	ns	>0.9999	A-D
WT vs. wBif	-10.46	No	ns	>0.9999	A-E
WT vs. wCaub	-12.74	No	ns	>0.9999	A-F
WT vs. wInn	-4.844	No	ns	>0.9999	A-G
Control gene vs. wmk	36.67	Yes	*	0.0164	B-C
Control gene vs. wBol1b	-12.47	No	ns	>0.9999	B-D
Control gene vs. wBif	-15.52	No	ns	>0.9999	B-E
Control gene vs. wCaub	-17.8	No	ns	>0.9999	B-F
Control gene vs. wInn	-9.906	No	ns	>0.9999	B-G
wmk vs. wBol1b	-49.14	Yes	***	0.0002	C-D
wmk vs. wBif	-52.19	Yes	***	0.0002	C-E
wmk vs. wCaub	-54.47	Yes	***	0.0003	C-F
wmk vs. wInn	-46.57	Yes	***	0.0007	C-G
wBol1b vs. wBif	-3.05	No	ns	>0.9999	D-E
wBol1b vs. wCaub	-5.331	No	ns	>0.9999	D-F
wBol1b vs. wInn	2.563	No	ns	>0.9999	D-G
wBif vs. wCaub	-2.281	No	ns	>0.9999	E-F
wBif vs. wInn	5.613	No	ns	>0.9999	E-G
wCaub vs. wInn	7.894	No	ns	>0.9999	F-G
Test details	Mean rank 1	Mean rank 2	Mean rank diff.	n1	n2	Z
WT vs. Control gene	52.31	47.25	5.063	16	18	0.5032
WT vs. wmk	52.31	10.58	41.73	16	12	3.732
WT vs. wBol1b	52.31	59.72	-7.406	16	16	0.7154
WT vs. wBif	52.31	62.77	-10.46	16	13	0.9564
WT vs. wCaub	52.31	65.05	-12.74	16	10	1.079
WT vs. wInn	52.31	57.16	-4.844	16	16	0.4679
Control gene vs. wmk	47.25	10.58	36.67	18	12	3.36
Control gene vs. wBol1b	47.25	59.72	-12.47	18	16	1.239
Control gene vs. wBif	47.25	62.77	-15.52	18	13	1.456
Control gene vs. wCaub	47.25	65.05	-17.8	18	10	1.541
Control gene vs. wInn	47.25	57.16	-9.906	18	16	0.9846
wmk vs. wBol1b	10.58	59.72	-49.14	12	16	4.394
wmk vs. wBif	10.58	62.77	-52.19	12	13	4.452
wmk vs. wCaub	10.58	65.05	-54.47	12	10	4.344
wmk vs. wInn	10.58	57.16	-46.57	12	16	4.165
wBol1b vs. wBif	59.72	62.77	-3.05	16	13	0.279
wBol1b vs. wCaub	59.72	65.05	-5.331	16	10	0.4517
wBol1b vs. wInn	59.72	57.16	2.563	16	16	0.2475
wBif vs. wCaub	62.77	65.05	-2.281	13	10	0.1852
wBif vs. wInn	62.77	57.16	5.613	13	16	0.5134
wCaub vs. wInn	65.05	57.16	7.894	10	16	0.6688
