# Supplementary material for: A single synonymous nucleotide change impacts the male-killing phenotype of prophage WO gene wmk
Source: eLife. 2021 Oct 22;10:e67686. doi: 10.7554/eLife.67686 (PMC8555981; doi:10.7554/eLife.67686)
Supplement: Figure 4—source data 1. — Data for qPCR from expression of transgenes with single codon changes corresponding to Figure 4D. [file elife-67686-fig4-data1.xlsx]

## Sheet: Sheet1
Figure 4C: Sex ratio single codon changes
Graphed:
WT	Control gene	wMel wmk	wMel wmk (new)	wSuzi codon	wRec codon	WT	Control gene	wMel wmk	wMel wmk (new)	wSuzi codon	wRec codon
0.733333	0.944444	0.357143	0.814815	1.57143	0.857143	0.809524	1.1875	0.666667	0.777778	0.777778	1
	0.941176	0.684211	0.435897	1.09091	1.52		1.25	1.07143	0.897436	0.928571	1.36842
1.22222	1.33333	0.55	0.75	1.42857	0.75	0.666667	1.07692	1.18182	1.09375	0.944444	1
0.818182	1	0.4	0.676471	0.833333	1.41667	1.28571	1	1	0.758621	0.875	1
0.947368	0.933333	0.6	0.828571	1.83333	0.666667	0.75	0.941176	1.21429	0.846154	1.72727	1.15
1.16667	0.861111	0.666667	0.674419	1.14286	0.962963	0.809524	1.2	1.15385	1.16129	1.23077	1
0.846154	0.733333	0.8	0.423077	1.78571	1.6	0.857143	1	1.5	0.923077	0.789474	1.08696
1.17647	1.66667	0.8	0.853659	1.06452	1.13333	1.05882	0.8125	1.16667	1	1.13333	1.04545
1	0.705882	0.866667	0.6875	1	1	1	1.36364	1.38462	0.757576	1.10526	1.36667
	0.913043	0.55	0.511111	0.625	1.25641		0.722222		1.21429	1.33333	0.763158
	0.714286	0.565217	0.724138	1	1.56522		1.2	0.842105	1.375	1.36364	0.894737
0.846154	0.792453		0.75			0.782609	1.54167	0.933333	1.58333
1.18182	0.933333		0.428571			1.16667	0.928571		1.18182
0.733333						1
Raw Data:
	wMel wmk
Vial	Act M	Act F	CyO M	CyO F	Act SR	CyO SR
1	5	14	8	12	0.357143	0.666667
2	13	19	15	14	0.684211	1.07143
3	11	20	13	11	0.55	1.18182
4	4	10	13	13	0.4	1
5	6	10	17	14	0.6	1.21429
6	10	15	15	13	0.666667	1.15385
7	12	15	18	12	0.8	1.5
8	12	15	14	12	0.8	1.16667
9	13	15	18	13	0.866667	1.38462
10	11	20	1	0	0.55
11	13	23	16	19	0.565217	0.842105
12	2	0	14	15		0.933333
13	1	2	1	0
14
	WT
Vial	Act M	Act F	CyO M	CyO F	Act SR	CyO SR
1	11	15	17	21	0.733333	0.809524
2	0	0	3	7
3	11	9	8	12	1.22222	0.666667
4	9	11	9	7	0.818182	1.28571
5	18	19	9	12	0.947368	0.75
6	14	12	17	21	1.16667	0.809524
7	11	13	6	7	0.846154	0.857143
8	20	17	18	17	1.17647	1.05882
9	20	20	8	8	1	1
10	12	9	3	9
11	4	4	2	1
12	11	13	18	23	0.846154	0.782609
13	13	11	7	6	1.18182	1.16667
14	11	15	10	10	0.733333	1
	Control Gene
Vial	Act M	Act F	CyO M	CyO F	Act SR	CyO SR
1	17	18	19	16	0.944444	1.1875
2	16	17	15	12	0.941176	1.25
3	12	9	14	13	1.33333	1.07692
4	19	19	15	15	1	1
5	14	15	16	17	0.933333	0.941176
6	31	36	36	30	0.861111	1.2
7	11	15	14	14	0.733333	1
8	10	6	13	16	1.66667	0.8125
9	12	17	15	11	0.705882	1.36364
10	42	46	26	36	0.913043	0.722222
11	10	14	12	10	0.714286	1.2
12	42	53	37	24	0.792453	1.54167
13	14	15	13	14	0.933333	0.928571
14	7	0	1	3
	wMel wmk (new)
Vial	Act M	Act F	CyO M	CyO F	Act SR	CyO SR
1	22	27	21	27	0.814815	0.777778
2	17	39	35	39	0.435897	0.897436
3	30	40	35	32	0.75	1.09375
4	23	34	22	29	0.676471	0.758621
5	29	35	22	26	0.828571	0.846154
6	29	43	36	31	0.674419	1.16129
7	11	26	12	13	0.423077	0.923077
8	35	41	19	19	0.853659	1
9	22	32	25	33	0.6875	0.757576
10	23	45	51	42	0.511111	1.21429
11	21	29	22	16	0.724138	1.375
12	21	28	19	12	0.75	1.58333
13	6	14	13	11	0.428571	1.18182
14
	wRec codon
Vial	Act M	Act F	CyO M	CyO F	Act SR	CyO SR
1	18	21	18	18	0.857143	1
2	38	25	26	19	1.52	1.36842
3	15	20	16	16	0.75	1
4	17	12	23	23	1.41667	1
5	20	30	23	20	0.666667	1.15
6	26	27	13	13	0.962963	1
7	24	15	25	23	1.6	1.08696
8	17	15	23	22	1.13333	1.04545
9	36	36	41	30	1	1.36667
10	49	39	29	38	1.25641	0.763158
11	36	23	34	38	1.56522	0.894737
12
13
14
	wSuzi codon
Vial	Act M	Act F	CyO M	CyO F	Act SR	CyO SR
1	11	7	14	18	1.57143	0.777778
2	12	11	13	14	1.09091	0.928571
3	10	7	17	18	1.42857	0.944444
4	15	18	14	16	0.833333	0.875
5	22	12	19	11	1.83333	1.72727
6	16	14	16	13	1.14286	1.23077
7	25	14	15	19	1.78571	0.789474
8	33	31	17	15	1.06452	1.13333
9	32	32	21	19	1	1.10526
10	15	24	12	9	0.625	1.33333
11	15	15	15	11	1	1.36364
12
13
14
