# Supplementary material for: A single synonymous nucleotide change impacts the male-killing phenotype of prophage WO gene wmk
Source: eLife. 2021 Oct 22;10:e67686. doi: 10.7554/eLife.67686 (PMC8555981; doi:10.7554/eLife.67686)
Supplement: Figure 4—source data 2. [file elife-67686-fig4-data2.xlsx]

## Sheet: Sheet1
Figure 4C: Sex ratios of single codon changes: Statistical output of Kruskal-Wallis test
Number of families	1
Number of comparisons per family	10
Alpha	0.05
Dunn's multiple comparisons test	Mean rank diff.	Significant?	Summary	Adjusted P Value
WT vs. Control gene	2.217	No	ns	>0.9999	A-B
WT vs. wmk	24.77	Yes	**	0.0072	A-C
WT vs. wmk (new)	21.83	Yes	*	0.0191	A-D
WT vs. wRec codon	-5.409	No	ns	>0.9999	A-F
Control gene vs. wmk	22.56	Yes	*	0.0134	B-C
Control gene vs. wmk (new)	19.62	Yes	*	0.0359	B-D
Control gene vs. wRec codon	-7.626	No	ns	>0.9999	B-F
wmk vs. wmk (new)	-2.941	No	ns	>0.9999	C-D
wmk vs. wRec codon	-30.18	Yes	***	0.0004	C-F
wmk (new) vs. wRec codon	-27.24	Yes	**	0.0011	D-F
Test details	Mean rank 1	Mean rank 2	Mean rank diff.	n1	n2	Z
WT vs. Control gene	38.91	36.69	2.217	11	13	0.3151
WT vs. wmk	38.91	14.14	24.77	11	11	3.383
WT vs. wmk (new)	38.91	17.08	21.83	11	13	3.104
WT vs. wRec codon	38.91	44.32	-5.409	11	11	0.7388
Control gene vs. wmk	36.69	14.14	22.56	13	11	3.206
Control gene vs. wmk (new)	36.69	17.08	19.62	13	13	2.912
Control gene vs. wRec codon	36.69	44.32	-7.626	13	11	1.084
wmk vs. wmk (new)	14.14	17.08	-2.941	11	13	0.418
wmk vs. wRec codon	14.14	44.32	-30.18	11	11	4.122
wmk (new) vs. wRec codon	17.08	44.32	-27.24	13	11	3.872
