# Supplementary material for: A single synonymous nucleotide change impacts the male-killing phenotype of prophage WO gene wmk
Source: eLife. 2021 Oct 22;10:e67686. doi: 10.7554/eLife.67686 (PMC8555981; doi:10.7554/eLife.67686)
Supplement: Figure 4—source data 3. [file elife-67686-fig4-data3.xlsx]

## Sheet: Sheet1
Figure 4D: qPCR codon change transgenes
Graphed:
wMel wmk	wMel wmk (new)	wSuzi codon	wRec codon
0.091505	0.071298	0.094078	0.10083
0.054409	0.148651	0.118257	0.05872
0.109576	0.136787	0.062068	0.090246
0.147624	0.108819	0.144586	0.11344
0.090246	0.052922	0.07911	0.145592
0.094078	0.066064	0.122428	0.086569
0.133972	0.170755	0.102949	0.094732
0.05366	0.111105	0.115824	0.115023
Raw Data:
	Rp49 cq	homolog cq	2^-(deltaCt)
wMel wmk	14.98	18.43	0.0915054
	13.77	17.97	0.0544094
	15.86	19.05	0.109576
	15.38	18.14	0.147624
	13.92	17.39	0.0902456
	14.24	17.65	0.0940779
	14.58	17.48	0.133972
	13.52	17.74	0.0536603
wMel wmk (new)	13.73	17.54	0.0712977
	14.35	17.1	0.148651
	13.22	16.09	0.136787
	15.48	18.68	0.108819
	16.11	20.35	0.0529216
	15.01	18.93	0.0660636
	13.77	16.32	0.170755
	13.35	16.52	0.111105
wSuzi codon	17.61	21.02	0.0940779
	15	18.08	0.118257
	15.03	19.04	0.0620683
	15.11	17.9	0.144586
	14.09	17.75	0.0791098
	16.38	19.41	0.122428
	17.83	21.11	0.102949
	15.58	18.69	0.115824
wRec codon	15.4	18.71	0.10083
	14.65	18.74	0.0587202
	14.97	18.44	0.0902456
	14.68	17.82	0.11344
	15.79	18.57	0.145592
	15.35	18.88	0.0865693
	13.41	16.81	0.0947323
	14.33	17.45	0.115023
