# Supplementary material for: A single synonymous nucleotide change impacts the male-killing phenotype of prophage WO gene wmk
Source: eLife. 2021 Oct 22;10:e67686. doi: 10.7554/eLife.67686 (PMC8555981; doi:10.7554/eLife.67686)
Supplement: Figure 4—source data 4. [file elife-67686-fig4-data4.xlsx]

## Sheet: Sheet1
Figure 4D: qPCR of single codon change transgenes: Statistical output of Kruskal-Wallis test
Number of families	1
Number of comparisons per family	6
Alpha	0.05
Dunn's multiple comparisons test	Mean rank diff.	Significant?	Summary	Adjusted P Value
wmk vs. wmk (new)	-3.25	No	ns	>0.9999	A-B
wmk vs. wSuzi codon	-3.438	No	ns	>0.9999	A-C
wmk vs. wRec codon	-1.313	No	ns	>0.9999	A-D
wmk (new) vs. wSuzi codon	-0.1875	No	ns	>0.9999	B-C
wmk (new) vs. wRec codon	1.938	No	ns	>0.9999	B-D
wSuzi codon vs. wRec codon	2.125	No	ns	>0.9999	C-D
Test details	Mean rank 1	Mean rank 2	Mean rank diff.	n1	n2	Z
wmk vs. wmk (new)	14.5	17.75	-3.25	8	8	0.693
wmk vs. wSuzi codon	14.5	17.94	-3.438	8	8	0.733
wmk vs. wRec codon	14.5	15.81	-1.313	8	8	0.2799
wmk (new) vs. wSuzi codon	17.75	17.94	-0.1875	8	8	0.03998
wmk (new) vs. wRec codon	17.75	15.81	1.938	8	8	0.4132
wSuzi codon vs. wRec codon	17.94	15.81	2.125	8	8	0.4531
