# Supplementary material for: A single synonymous nucleotide change impacts the male-killing phenotype of prophage WO gene wmk
Source: eLife journal article supplement (doi:10.7554/elife.67686), 2021-10-22
Supplement: figures [file elife-67686-figures-v3.pdf]

---

## Figures and figure supplements

A single synonymous nucleotide change impacts the male-killing phenotype of prophage WO gene *Wmk*

**Jessamyn I Perlmutter et al**

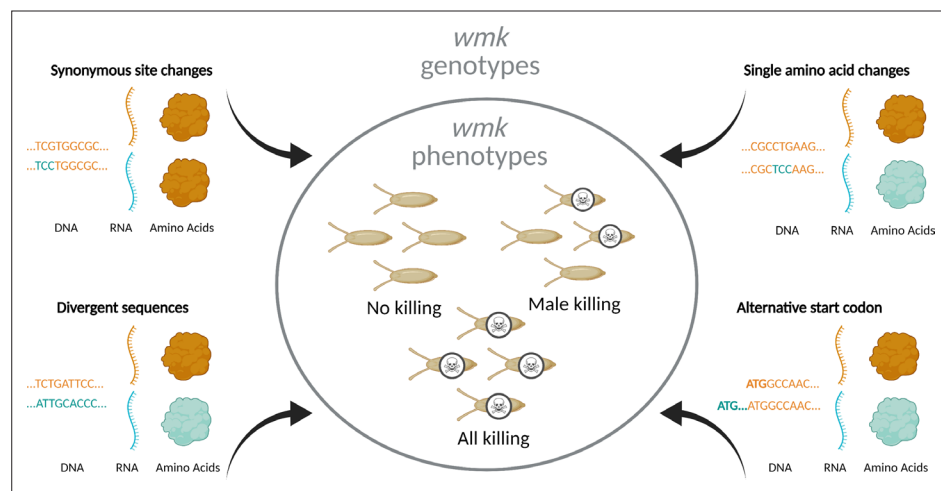

**Figure 1.** Overview of experimental design. To investigate the genotype-phenotype landscape, we transgenically expressed *wmk* homologs with varying degrees of genetic changes. These sequences are codon-optimized based on different codon biases due to different tRNA abundances in the divergent bacterial source and eukaryotic destination species (Plotkin and Kudla, 2011; Gustafsson et al., 2004). Transgenic *wmk* in *Drosophila melanogaster* embryos results in three different phenotypes: no killing, male killing, and killing of males and females. Compared to *wMel wmk*, these transgenes were either divergent homologs from other *Wolbachia* strains, a homolog with a single amino acid change, homologs with an additional nine codons at the 5' ends of the genes starting at an alternative upstream start codon, or variants with a single synonymous codon or nucleotide difference. These genotypes resulted in varying degrees of RNA sequence- and amino acid-level changes. Created with BioRender.com.

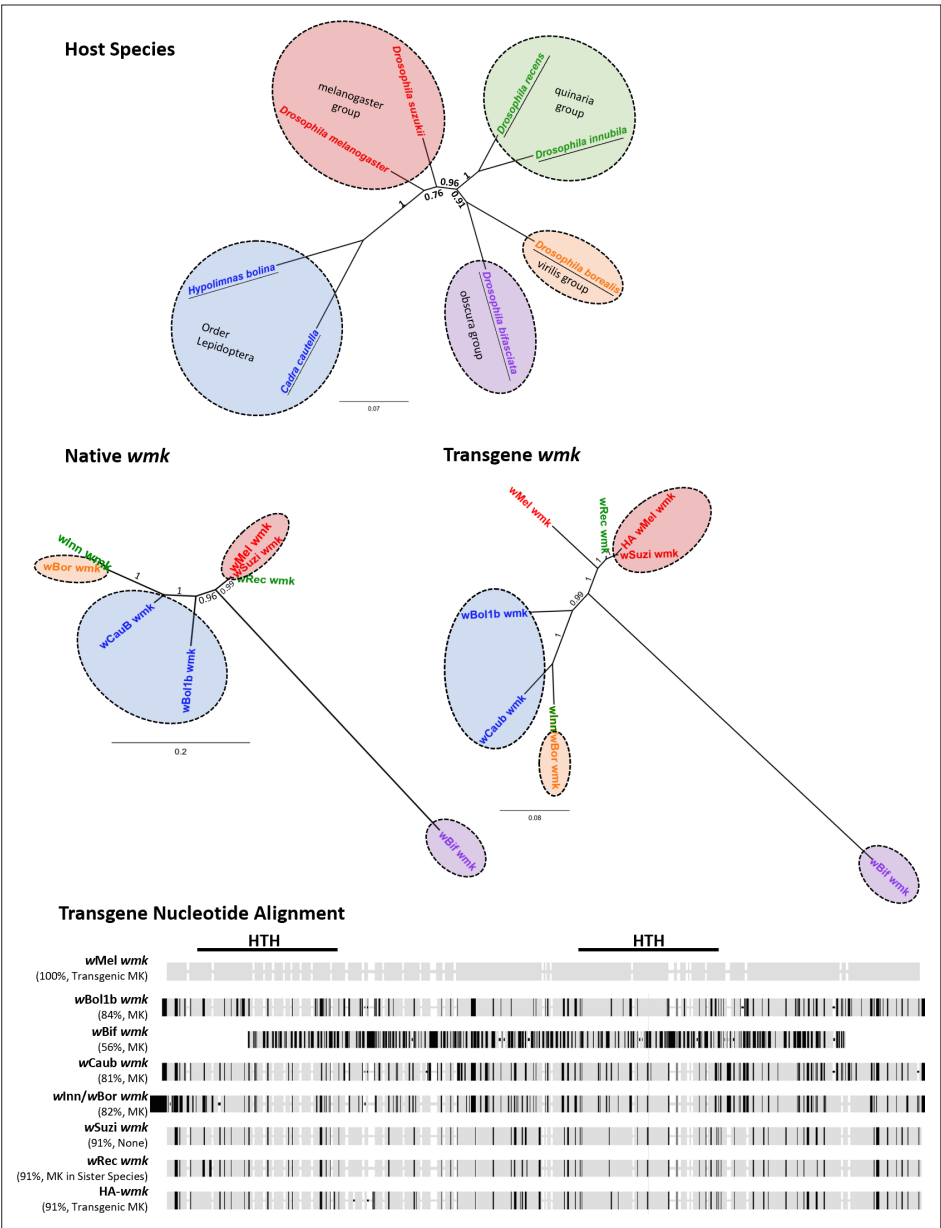

**Figure 1—figure supplement 1.** Homologs of *wmk* tested in this study include variation in native gene and transgene sequence identity as well as host species. (Top) Bayesian nucleotide phylogeny of insect hosts based on 652 bp of the cytochrome oxidase subunit 1 (COI) gene from *D. melanogaster*, *H. bolina*, *D. bifasciata*, *C. caustella*, *D. innubila*, *D. borealis*, *D. suzukii*, and *D. recens*. Branch labels and scale bar indicate posterior probability. Species names are colored either by group within the *Drosophila* genus or by Order Lepidoptera. Underlines indicate hosts in which male-killing strains have been reported. Colored circles indicate host species group. (Middle) Bayesian nucleotide phylogenies of native (middle left, non-transgenic) or transgene (middle right) *wmk* sequences based on 690 or 686 bp, respectively. Label colors reflect groups from host phylogeny for comparison. Colored circles indicate host species group. Branch labels and scale bar indicate posterior probability. *wBif wmk* branches distantly due to a highly divergent sequence. *wBor* and *winn wmk* share a branch because they share the same transgenic sequence. (Bottom) Nucleotide alignment of transgenes tested in this study as compared to the previously tested *wMel wmk*, with the regions encompassing the Helix-turn-helix (HTH) protein domains marked with black lines. Black ticks indicate sequence differences with the *wMel wmk* reference strain, light gray indicates sequence matches to the reference sequence, and white indicates an indel in at least one strain. In parentheses under strain names, percentages refer to nucleotide similarity compared to the *wMel wmk* transgene. MK indicates a male killing strain in its native host, transgenic MK indicates the ability to induce a biased sex ratio transgenically only, and MK in sister species indicates the ability to kill males in a sister host species but not in the native host species. Alignment excludes the HA tag in the tagged strain, which is located between the two HTH domains.

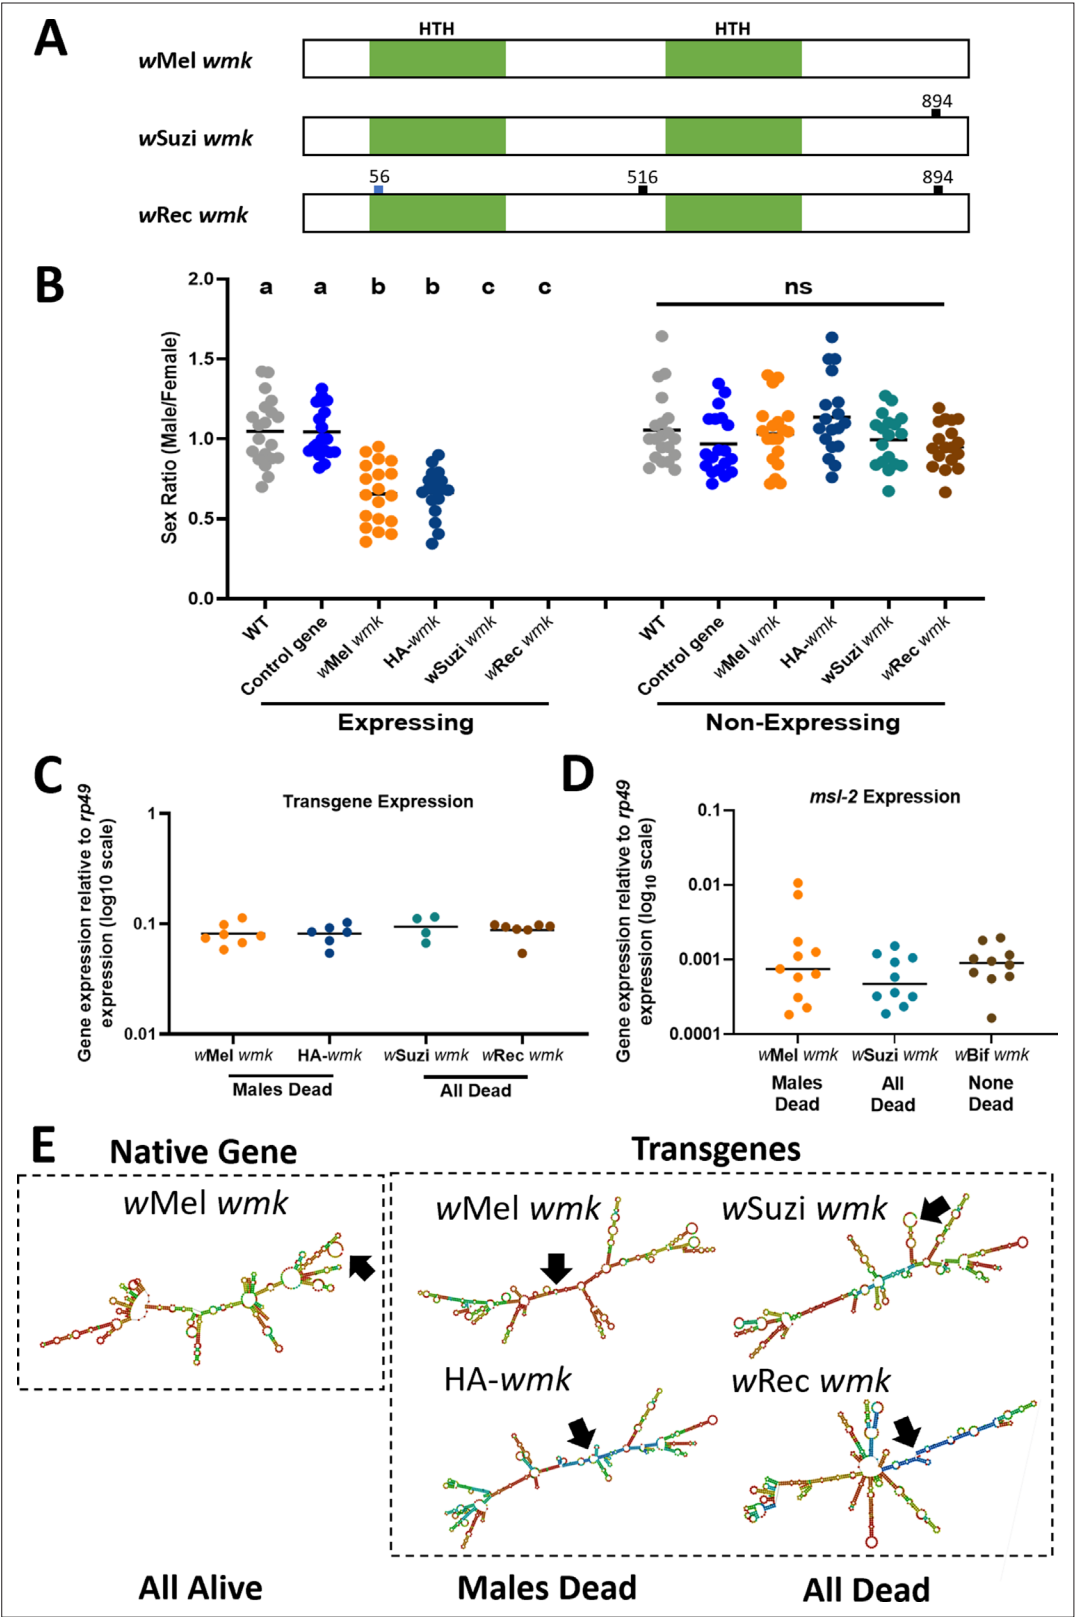

**Figure 2.** Transgenic expression of closely related *wmk* homologs causes male killing and all killing phenotypes in *D. melanogaster*. (A) Schematic of *wMel*, *wSuzi*, and *wRec wmk* native nucleotide sequences. The blue tick mark indicates a non-synonymous nucleotide difference. Black tick marks indicate synonymous nucleotide changes. Numbers indicate nucleotide position across the entire 912 nucleotide sequence. (B) Sex ratios of adult flies are

Figure 2 continued on next page

*Figure 2 continued*

shown for expressing (Act5c-Gal4) and non-expressing (CyO) embryonic offspring. Each sample point represents the adult offspring (N = 50–157, mean 86) produced by a replicate family of ten mothers and two fathers, with expressing and non-expressing flies of a given genotype being siblings. Bars represent the mean sex ratio. Statistics are based on a Kruskal-Wallis, one-way ANOVA followed by Dunn's correction across either expressing or non-expressing flies. wRec and wSuzi *wmk* have no points in the expressing category due to death of most or all males and females. HA-*wmk* contains a 3 X HA tag in the linker region between the two helix-turn-helix domains. This experiment was performed twice. Data and statistical outputs are available in **Figure 2—source data 1** and **Figure 2—source data 2**, respectively. (C) Gene expression in embryos 4–5 h AED of each indicated *wmk* transgene from (B), relative to *Drosophila* housekeeping gene, *rp49*. There is no significant difference in expression based on a Kruskal-Wallis one-way ANOVA followed by Dunn's correction. Data and statistical outputs are available in **Figure 2—source data 3** and **Figure 2—source data 4**, respectively. (D) Gene expression in embryos 4–5 h AED of the host *msl-2* dosage compensation gene relative to *rp49* under simultaneous expression of the indicated transgene. There is no significant difference in expression based on a Kruskal-Wallis one-way ANOVA followed by Dunn's correction. Data and statistical outputs are available in **Figure 2—source data 5** and **Figure 2—source data 6**, respectively. (E) Predicted RNA secondary structures of native wMel *wmk* and several transgene strains. Black arrows point to the location of the start codon within each structure.

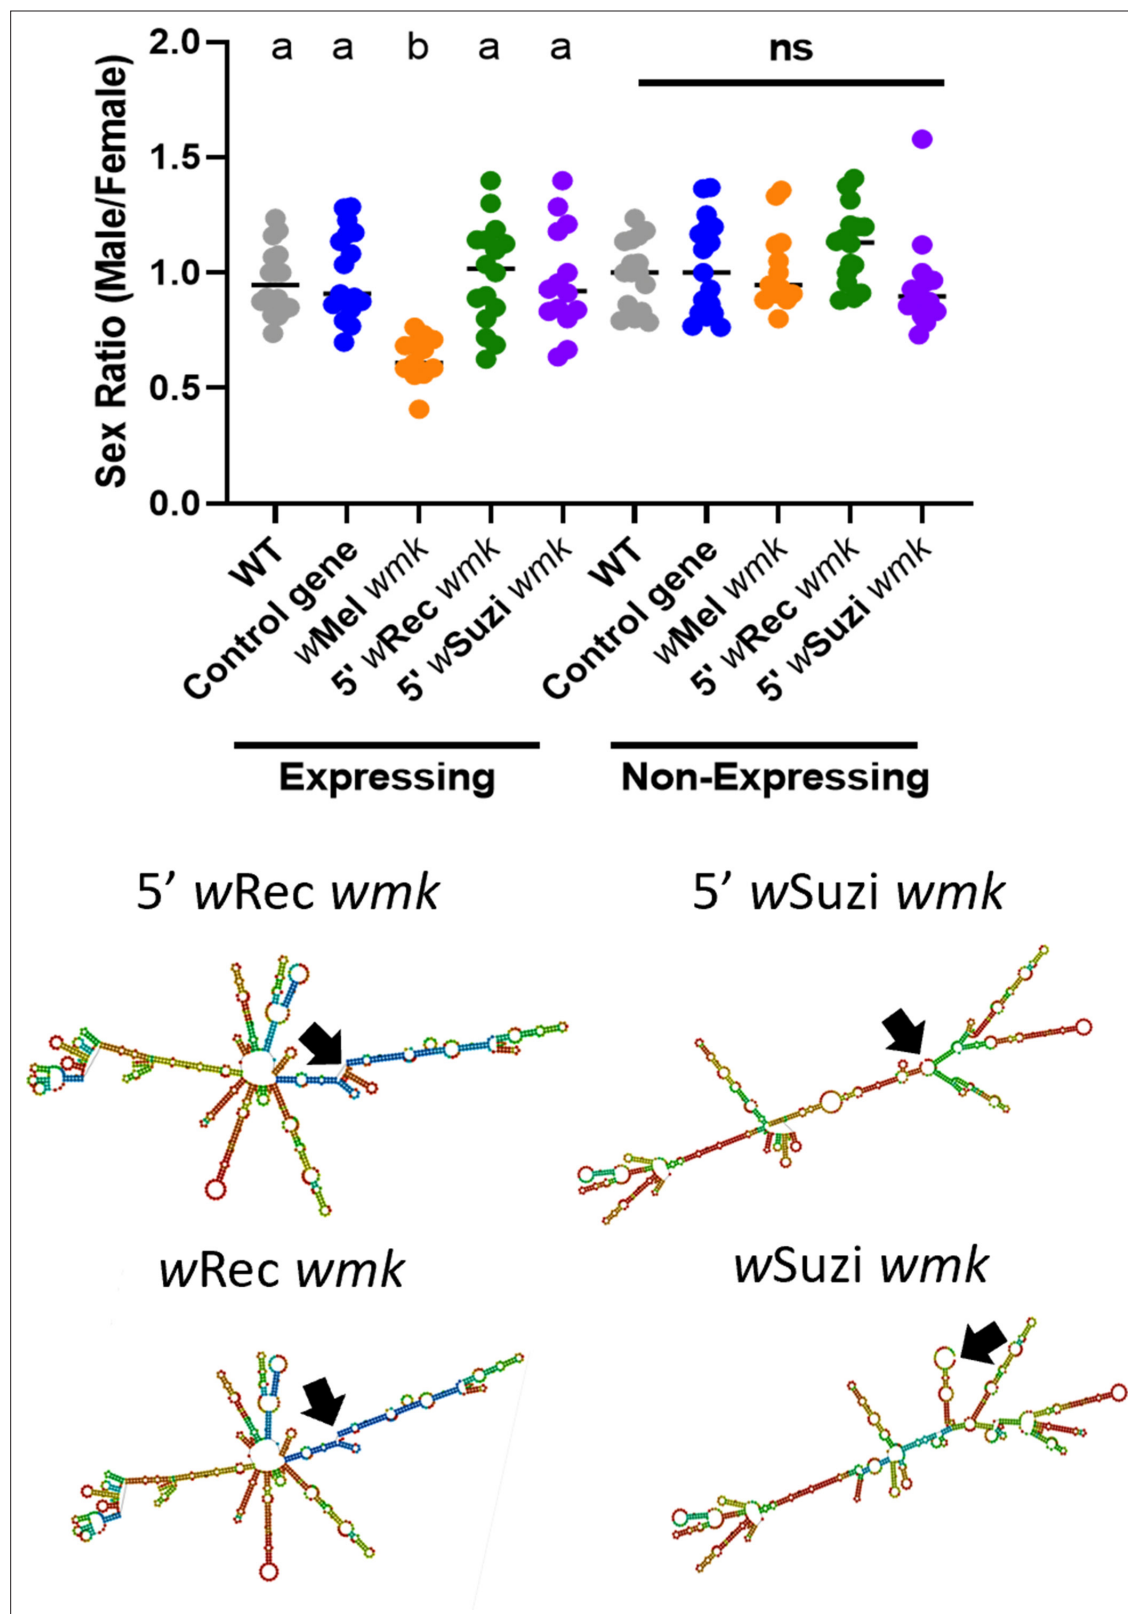

**Figure 2—figure supplement 1.** wRec and wSuzi transgenes expressed with an alternative start codon lose their transgenic phenotypes. (Top) Sex ratios of adult flies are shown for expressing (*Act5c-Gal4*) and non-expressing (*CyO*) offspring. Each sample point represents the adult offspring ( $N = 50\text{--}120$ , mean 84) produced by a replicate family of 10 mothers and 2 fathers, with expressing and non-expressing flies of a given genotype being siblings. Bars represent the mean sex ratio. Statistics are based on a Kruskal-Wallis one-way ANOVA followed by Dunn's correction across either expressing or

Figure 2—figure supplement 1 continued on next page

*Figure 2—figure supplement 1 continued*

non-expressing flies. This experiment was performed twice. Data and statistical outputs are available in **Figure 2—source data 7** and **Figure 2—source data 8**, respectively. (Bottom) Predicted RNA secondary structures of the wRec and wSuzi *wmk* transgenes with the additional 5' sequence exhibit slight structural changes compared to their non-lengthened counterparts (included again from **Figure 2** for ease of comparison). Black arrows point to the location of the start codon within each structure.

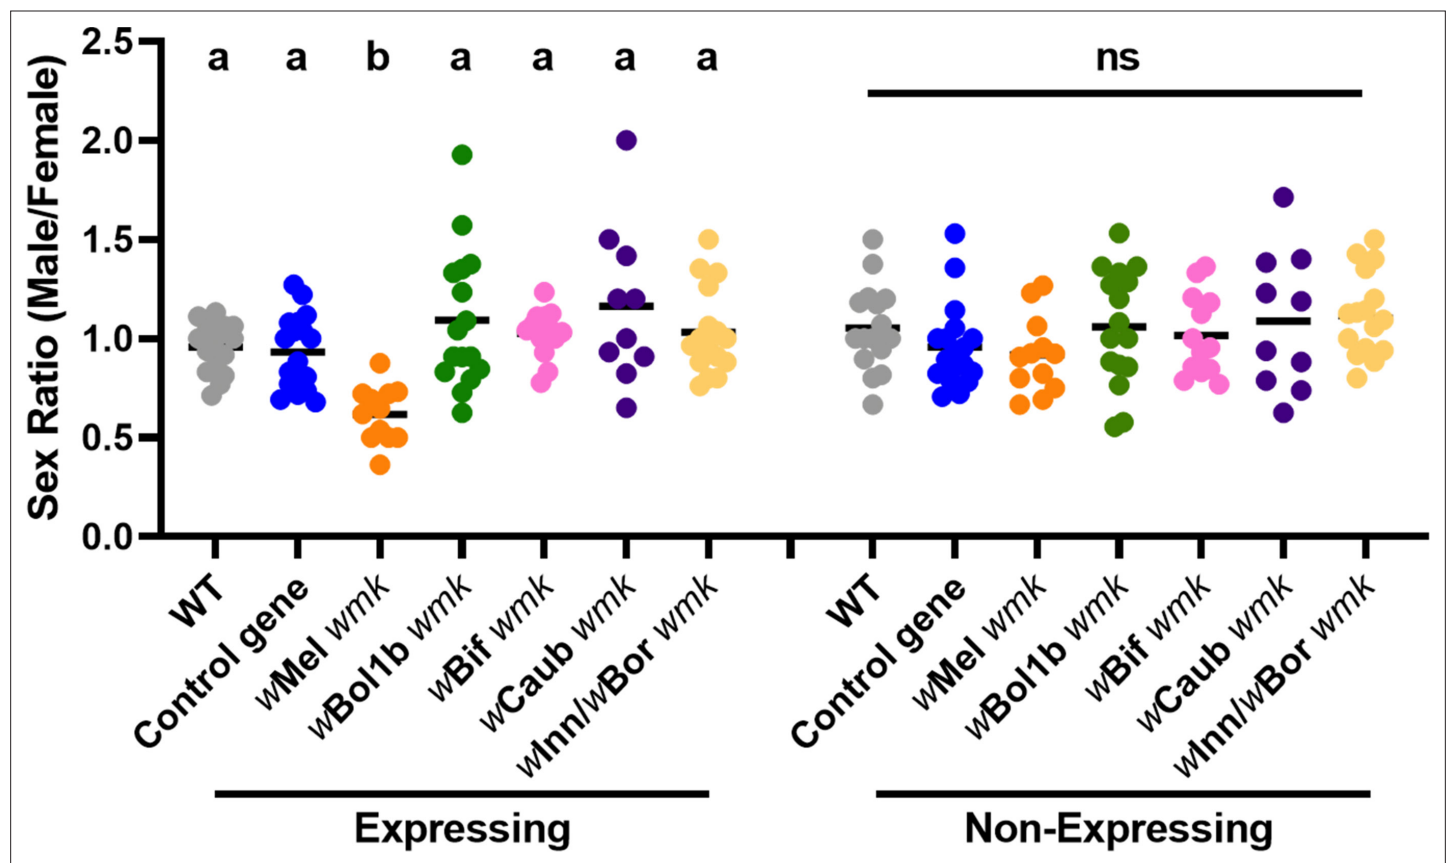

**Figure 3.** Divergent homologs of *wmk* from male-killing strains do not induce a biased sex ratio in *D. melanogaster*. Sex ratios of adult flies are shown from either expressing (*Act5c-Gal4*) or non-expressing (*CyO*) offspring. WT refers to the background insertion line and Control gene refers to the WD0034 control transgene that induces no sex ratio bias. Each sample point represents the adult offspring (N = 50–132, mean 69) produced by a replicate family of ten mothers and two fathers, with expressing and non-expressing flies of a given genotype being siblings. Bars represent the mean sex ratio. Statistics are based on a Kruskal-Wallis one-way ANOVA followed by Dunn's correction across either expressing or non-expressing flies. This experiment was performed twice. Data and statistical outputs are available in **Figure 3—source data 1** and **Figure 3—source data 2**, respectively.



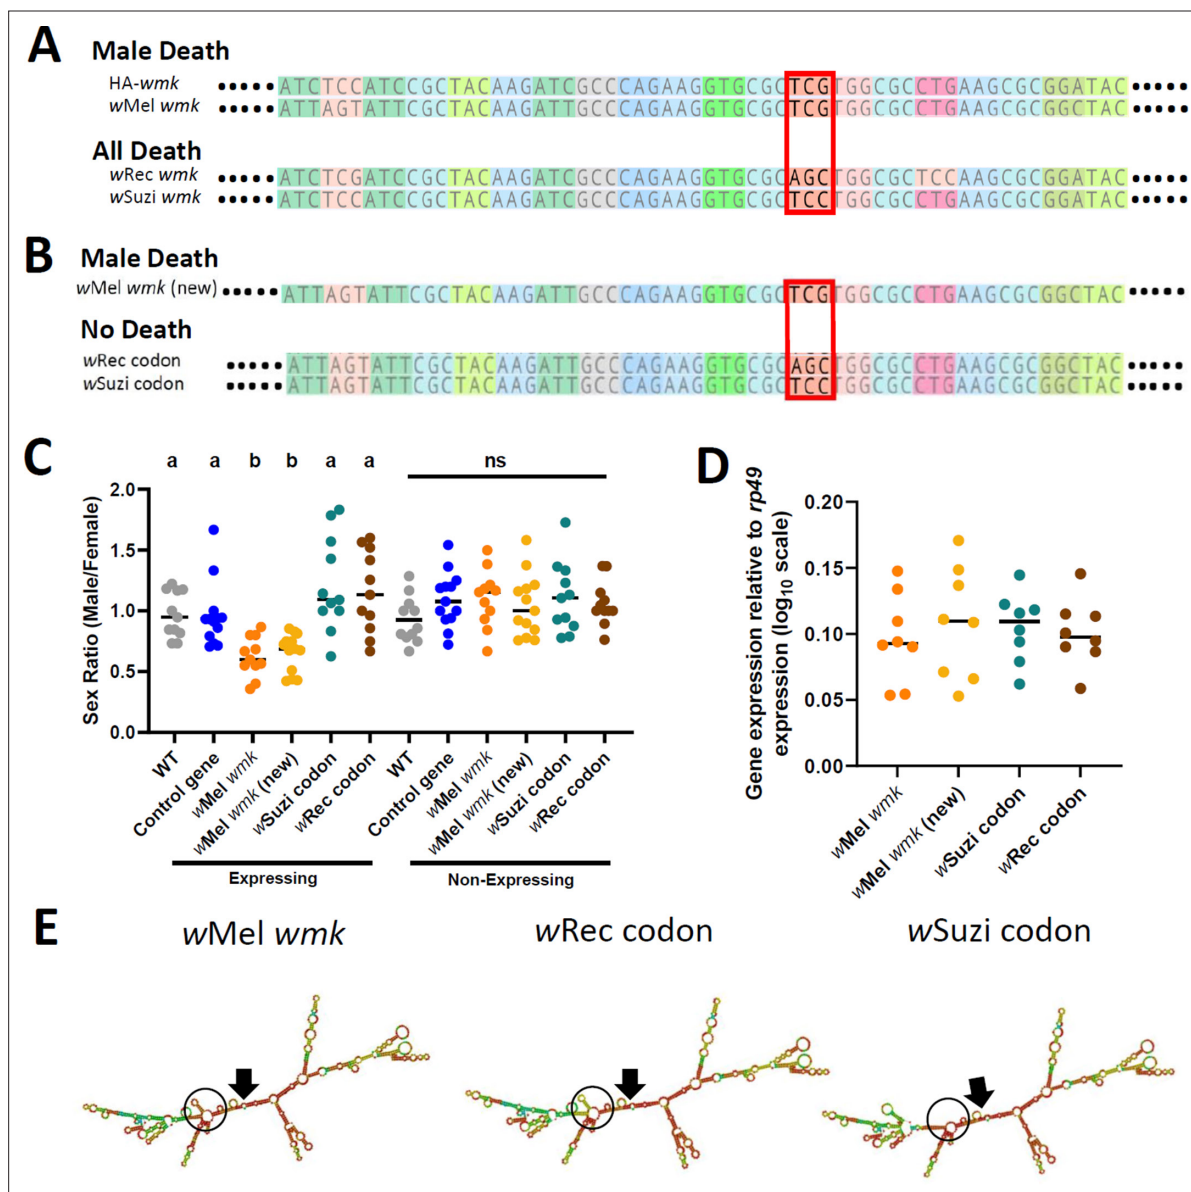

**Figure 4.** Synonymous nucleotide changes in the 16th codon position of *wmk* alters resulting phenotype. **(A)** Sequence alignment of transgenic *wmk* homologs. The codon farthest on the left is the fourth codon in the sequence, and the highlighted codon is the 16th, with the farthest right representing the 23rd codon, and ellipses indicating codons continuing on either side. The red box outlines where the genotypes cluster by phenotype. The 'HA-*wmk*' and 'wMel *wmk*' genotypes share the same codon in this position, and both induce male-specific death. The 'wRec *wmk*' and 'wSuzi *wmk*' genotypes both exhibit different codons from the previous two and exhibit an all-killing phenotype. Colors correlate with amino acid identity. **(B)** Sequence alignment of transgenes with either the wMel *wmk* sequence made anew (wMel *wmk* new), or with the 16th codon (red box) replaced with the synonymous codons from the wRec and wSuzi *wmk* transgenes. The colors and symbols reflect those in **(A)**. **(C)** Sex ratios of adult transgenic flies are shown for expressing (*Act5c-Gal4*) and non-expressing (*CyO*) offspring that include the original transgene wMel *wmk* strain used in previous figures, along with the newly created identical wMel *wmk* (new) transgene and the additional transgenes with the single codon swapped out for the indicated codons noted in **(A)**. wSuzi codon and wRec codon refer to the strains that have the same sequence as the wMel *wmk*, but with one or three silent sites changed in the single codon at the 16th amino acid position. Each sample point represents the adult offspring ( $N = 50\text{--}161$ , mean 73) produced by a replicate family of 10 mothers and two fathers, with expressing and non-expressing flies of a given genotype being siblings. Bars represent the mean sex ratio. Statistics are based on a Kruskal-Wallis one-way ANOVA followed by Dunn's correction across either expressing or non-expressing flies. This experiment was performed twice. Data and statistical outputs are available in **Figure 4—source data 1** and **Figure 4—source data 2**, respectively. **(D)** Gene expression in embryos 4–5 h AED denotes expression of each transgene relative to that of *rp49*. There is no significant difference in expression based on a Kruskal-Wallis one-way ANOVA followed by Dunn's correction. Data and statistical outputs are available in **Figure 4—source data 3** and **Figure 4—source data 4**, respectively. **(E)** Predicted RNA secondary structures of the wMel *wmk* transcript compared to both of the wRec or wSuzi codon transgenes exhibiting slight structural differences. The structure for transgene wMel *wmk* is included again from **Figure 3** for ease of comparison.

Figure 4 continued on next page

*Figure 4 continued*

Black arrows point to the location of the start codon within each structure. Black circles highlight a key area of difference between the structures, with a stem absent in the wSuzi codon strain, and different base pair match probabilities calculated for each as indicated by color (blue to red, low to high probability). Within the black circle, the wSuzi codon transgene structure is missing a predicted stem that the others have. The stem in the wRec codon line, while present, has a weaker prediction as noted by the cooler colors, so there may be structural differences compared to the wMel wmk model.
