# Supplementary material for: A single synonymous nucleotide change impacts the male-killing phenotype of prophage WO gene wmk
Source: eLife. 2021 Oct 22;10:e67686. doi: 10.7554/eLife.67686 (PMC8555981; doi:10.7554/eLife.67686)
Supplement: Source data 1. [file elife-67686-supp1.xlsx]

## Sheet: Figure 2- Source Data 1
Figure 2B: Sex ratios of closely-related homologs
Graphed Data:
Expressing							Non-Expressing
WT	Control gene	wMel wmk	HA-wmk	wSuzi wmk	wRec wmk		WT	Control gene	wMel wmk	HA-wmk	wSuzi wmk	wRec wmk
0.90625	1.26923	0.405405	0.40625				1	0.793103	1.10714	1.5	1.12903	0.814815
1.16667	1.23684	0.645161	0.685714				1.08571	1.08696	1	0.833333	1.03226	0.941176
1.13793	0.952381	0.952381	0.857143				0.818182	0.904762	1.38462	1.05882	0.673469	0.869565
0.878049	1	0.485714	0.75				1	1.13158	0.84	1.42857	1.08824	1.125
0.964286	1	0.875	0.9				1	0.793103	1.35294	0.954545	1.10256	1
0.880952	1.24138	0.782609	0.344828				0.947368	0.833333	1.04545	1.06667	1.24138	0.978723
1.2	1.23333	0.863636	0.625				1.13043	0.875	1.14286	0.875	1.27027	0.827586
1.13793	0.918919	0.5	0.742857				1.02174	0.931034	1	1.15789	1.025	1.19444
1.41667	0.965517	0.444444	0.684211				0.884615	0.925926	1.05714	1.06667	0.842105	1.03636
0.761905	0.820513	0.75	0.666667				1.3913	0.72	0.923077	1.5	0.888889
0.871795	0.930233	0.92	0.68				1.40909	0.766667	1.14286	1.23077	1.09091	1.10811
1.24	1.31579		0.55				0.9	0.806452		1		0.947368
1.31818	0.916667	0.606061	0.785714				1.04	1.34783	0.875	1.21429	0.804878	0.806452
0.833333	0.925	0.6875	0.791667				1.1	1.125	1	1.63636	0.837838	1.125
0.7	0.9	0.833333	0.689655				0.807692	0.884615	0.75	1.1	0.964286	0.907407
1	0.842105	0.52	0.47619				0.95	0.848485	0.722222	1.125	0.833333	0.894737
1.08696	1.07407	0.416667	0.617647				1.64286	1.125	1.05	0.76	1.16216	0.947368
0.923077	1.125	0.357143	0.73913				0.857143	1.22222	1.4	0.95	0.857143	1.11905
1.10256	1.16667	0.777778					1.25926	1.29167	0.72
1.42308		0.65					0.857143		1.08333		1.06667	0.666667
Raw Data:
	wMel wmk
Vial	Act M	Act F	CyO M	CyO F	sum	Act M/F	CyO M/F
1	15	37	31	28	111	0.405405	1.10714
2	20	31	22	22	95	0.645161	1
3	20	21	18	13	72	0.952381	1.38462
4	17	35	21	25	98	0.485714	0.84
5	14	16	23	17	70	0.875	1.35294
6	18	23	23	22	86	0.782609	1.04545
7	19	22	16	14	71	0.863636	1.14286
8	12	24	21	21	78	0.5	1
9	12	27	37	35	111	0.444444	1.05714
10	15	20	24	26	85	0.75	0.923077
11	23	25	24	21	93	0.92	1.14286
12	8	11	7	7	33
13	20	33	21	24	98	0.606061	0.875
14	22	32	13	13	80	0.6875	1
15	15	18	12	16	61	0.833333	0.75
16	13	25	13	18	69	0.52	0.722222
17	10	24	21	20	75	0.416667	1.05
18	10	28	28	20	86	0.357143	1.4
19	14	18	18	25	75	0.777778	0.72
20	13	20	26	24	83	0.65	1.08333
	Control Gene
Vial	Act M	Act F	CyO M	CyO F	sum	Act M/F	CyO M/F
1	33	26	23	29	111	1.26923	0.793103
2	47	38	25	23	133	1.23684	1.08696
3	40	42	19	21	122	0.952381	0.904762
4	38	38	43	38	157	1	1.13158
5	24	24	23	29	100	1	0.793103
6	36	29	20	24	109	1.24138	0.833333
7	37	30	28	32	127	1.23333	0.875
8	34	37	27	29	127	0.918919	0.931034
9	28	29	25	27	109	0.965517	0.925926
10	32	39	18	25	114	0.820513	0.72
11	40	43	23	30	136	0.930233	0.766667
12	25	19	25	31	100	1.31579	0.806452
13	33	36	31	23	123	0.916667	1.34783
14	37	40	18	16	111	0.925	1.125
15	36	40	23	26	125	0.9	0.884615
16	32	38	28	33	131	0.842105	0.848485
17	29	27	27	24	107	1.07407	1.125
18	36	32	22	18	108	1.125	1.22222
19	35	30	31	24	120	1.16667	1.29167
	WT
Vial	Act M	Act F	CyO M	CyO F	sum	Act M/F	CyO M/F
1	29	32	29	29	119	0.90625	1
2	35	30	38	35	138	1.16667	1.08571
3	33	29	18	22	102	1.13793	0.818182
4	36	41	27	27	131	0.878049	1
5	27	28	30	30	115	0.964286	1
6	37	42	36	38	153	0.880952	0.947368
7	30	25	26	23	104	1.2	1.13043
8	33	29	47	46	155	1.13793	1.02174
9	34	24	23	26	107	1.41667	0.884615
10	32	42	32	23	129	0.761905	1.3913
11	34	39	31	22	126	0.871795	1.40909
12	31	25	18	20	94	1.24	0.9
13	29	22	26	25	102	1.31818	1.04
14	25	30	11	10	76	0.833333	1.1
15	21	30	21	26	98	0.7	0.807692
16	26	26	19	20	91	1	0.95
17	25	23	23	14	85	1.08696	1.64286
18	12	13	12	14	51	0.923077	0.857143
19	43	39	34	27	143	1.10256	1.25926
20	37	26	30	35	128	1.42308	0.857143
	HA-wmk
Vial	Act M	Act F	CyO M	CyO F	sum	Act M/F	CyO M/F
1	13	32	21	14	80	0.40625	1.5
2	24	35	15	18	92	0.685714	0.833333
3	18	21	18	17	74	0.857143	1.05882
4	21	28	20	14	83	0.75	1.42857
5	18	20	21	22	81	0.9	0.954545
6	10	29	16	15	70	0.344828	1.06667
7	15	24	14	16	69	0.625	0.875
8	26	35	22	19	102	0.742857	1.15789
9	13	19	16	15	63	0.684211	1.06667
10	10	15	18	12	55	0.666667	1.5
11	17	25	16	13	71	0.68	1.23077
12	11	20	16	16	63	0.55	1
13	22	28	17	14	81	0.785714	1.21429
14	19	24	18	11	72	0.791667	1.63636
15	20	29	22	20	91	0.689655	1.1
16	10	21	18	16	65	0.47619	1.125
17	21	34	19	25	99	0.617647	0.76
18	17	23	19	20	79	0.73913	0.95
19
20
	wRec wmk
Vial	Act M	Act F	CyO M	CyO F	sum	Act M/F	CyO M/F
1			44	54	98	#DIV/0!	0.814815
2			16	17	33	#DIV/0!	0.941176
3			20	23	43	#DIV/0!	0.869565
4			27	24	51	#DIV/0!	1.125
5			28	28	56	#DIV/0!	1
6			46	47	93	#DIV/0!	0.978723
7			24	29	53	#DIV/0!	0.827586
8			43	36	79	#DIV/0!	1.19444
9			57	55	112	#DIV/0!	1.03636
10			12	12	24	#DIV/0!
11			41	37	78	#DIV/0!	1.10811
12			18	19	37	#DIV/0!	0.947368
13			25	31	56	#DIV/0!	0.806452
14			36	32	68	#DIV/0!	1.125
15			49	54	103	#DIV/0!	0.907407
16			34	38	72	#DIV/0!	0.894737
17			54	57	111	#DIV/0!	0.947368
18			47	42	89	#DIV/0!	1.11905
19			6	9	15	#DIV/0!
20			10	15	25	#DIV/0!	0.666667
	wSuzi wmk
Vial	Act M	Act F	CyO M	CyO F	sum	Act M/F	CyO M/F
1			35	31	66	#DIV/0!	1.12903
2			32	31	63	#DIV/0!	1.03226
3			33	49	82	#DIV/0!	0.673469
4			37	34	71	#DIV/0!	1.08824
5			43	39	82	#DIV/0!	1.10256
6			36	29	65	#DIV/0!	1.24138
7			47	37	84	#DIV/0!	1.27027
8			41	40	81	#DIV/0!	1.025
9			32	38	70	#DIV/0!	0.842105
10			32	36	68	#DIV/0!	0.888889
11			36	33	69	#DIV/0!	1.09091
12			5	8	13	#DIV/0!
13			33	41	74	#DIV/0!	0.804878
14			31	37	68	#DIV/0!	0.837838
15			27	28	55	#DIV/0!	0.964286
16			25	30	55	#DIV/0!	0.833333
17			43	37	80	#DIV/0!	1.16216
18			24	28	52	#DIV/0!	0.857143
19			1	5	6	#DIV/0!
20			32	30	62	#DIV/0!	1.06667

## Sheet: Figure 2- Source Data 2
Figure 2B: Sex ratios of closely-related homologs: Statistical output of Kruskal-Wallis test
Number of families	1
Number of comparisons per family	15
Alpha	0.05
Dunn's multiple comparisons test	Mean rank diff.	Significant?	Summary	Adjusted P Value
WT vs. Control gene	-1.784	No	ns	>0.9999	A-B
WT vs. wmk	33.06	Yes	*	0.0185	A-C
WT vs. HA-wmk	34.12	Yes	*	0.0151	A-D
WT vs. wSuzi	71.9	Yes	****	<0.0001	A-E
WT vs. wRec	71.9	Yes	****	<0.0001	A-F
Control gene vs. wmk	34.84	Yes	*	0.0116	B-C
Control gene vs. HA-wmk	35.91	Yes	**	0.0094	B-D
Control gene vs. wSuzi	73.68	Yes	****	<0.0001	B-E
Control gene vs. wRec	73.68	Yes	****	<0.0001	B-F
wmk vs. HA-wmk	1.064	No	ns	>0.9999	C-D
wmk vs. wSuzi	38.84	Yes	**	0.0033	C-E
wmk vs. wRec	38.84	Yes	**	0.0033	C-F
HA-wmk vs. wSuzi	37.78	Yes	**	0.0058	D-E
HA-wmk vs. wRec	37.78	Yes	**	0.0058	D-F
wSuzi vs. wRec	0	No	ns	>0.9999	E-F
Test details	Mean rank 1	Mean rank 2	Mean rank diff.	n1	n2	Z
WT vs. Control gene	90.4	92.18	-1.784	20	19	0.1744
WT vs. wmk	90.4	57.34	33.06	20	19	3.232
WT vs. HA-wmk	90.4	56.28	34.12	20	18	3.289
WT vs. wSuzi	90.4	18.5	71.9	20	18	6.931
WT vs. wRec	90.4	18.5	71.9	20	18	6.931
Control gene vs. wmk	92.18	57.34	34.84	19	19	3.363
Control gene vs. HA-wmk	92.18	56.28	35.91	19	18	3.419
Control gene vs. wSuzi	92.18	18.5	73.68	19	18	7.016
Control gene vs. wRec	92.18	18.5	73.68	19	18	7.016
wmk vs. HA-wmk	57.34	56.28	1.064	19	18	0.1013
wmk vs. wSuzi	57.34	18.5	38.84	19	18	3.698
wmk vs. wRec	57.34	18.5	38.84	19	18	3.698
HA-wmk vs. wSuzi	56.28	18.5	37.78	18	18	3.549
HA-wmk vs. wRec	56.28	18.5	37.78	18	18	3.549
wSuzi vs. wRec	18.5	18.5	0	18	18	0

## Sheet: Figure 2- Source Data 3
Figure 2C: Closely-related transgene qPCR
Graphed:
wSuzi wmk	wRec wmk	wMel wmk	HA-wmk
0.1157	0.0954788	0.0803342	0.0846608
0.0830073	0.0897769	0.0674653	0.0922437
0.0669547	0.0979648	0.0982533	0.0542889
0.11171	0.0539173	0.0582105	0.103106
	0.0881421	0.0776717	0.0840826
	0.0937218	0.113258	0.0704235
	0.0977043	0.074159
Raw Data:
	Rp49 cq	homolog cq	2^-(deltaCt)
wSuzi wmk	16.9528	20.0643	0.1157
	18.3576	21.9482	0.0830073
	13.8574	19.7618	0.0166955
	14.9986	18.1608	0.111709
wRec wmk	13.9335	17.3222	0.0954788
	13.8958	17.3733	0.0897769
	13.8535	17.2051	0.0979648
	15.01	19.2231	0.0539173
	14.8466	20.5786	0.0188142
	13.5175	16.933	0.0937218
	13.4346	16.79	0.0977043
wMel wmk	14.0307	17.6685	0.0803342
	13.6474	17.5371	0.0674653
	15.6546	19.002	0.0982533
	13.4049	17.5075	0.0582105
	14.2741	17.9606	0.0776717
	14.009	17.1514	0.113258
	13.3971	17.1504	0.074159
HA-wmk	12.6803	16.2425	0.0846608
	13.8772	17.3156	0.0922437
	14.0525	18.2557	0.0542889
	13.3815	16.6593	0.103106
	14.1955	17.7675	0.0840826
	13.3707	17.1985	0.0704235

## Sheet: Figure 2- Source Data 4
Figure 2C: qPCR for closely related transgene expression: Statistical output of Kruskal-Wallis test
Number of families	1
Number of comparisons per family	6
Alpha	0.05
Dunn's multiple comparisons test	Mean rank diff.	Significant?	Summary	Adjusted P Value
wSuzi vs. wRec	1	No	ns	>0.9999	A-B
wSuzi vs. wmk	4.286	No	ns	>0.9999	A-C
wSuzi vs. HA-wmk	3.833	No	ns	>0.9999	A-D
wRec vs. wmk	3.286	No	ns	>0.9999	B-C
wRec vs. HA-wmk	2.833	No	ns	>0.9999	B-D
wmk vs. HA-wmk	-0.4524	No	ns	>0.9999	C-D
Test details	Mean rank 1	Mean rank 2	Mean rank diff.	n1	n2	Z
wSuzi vs. wRec	15	14	1	4	7	0.2256
wSuzi vs. wmk	15	10.71	4.286	4	7	0.967
wSuzi vs. HA-wmk	15	11.17	3.833	4	6	0.8398
wRec vs. wmk	14	10.71	3.286	7	7	0.8693
wRec vs. HA-wmk	14	11.17	2.833	7	6	0.7202
wmk vs. HA-wmk	10.71	11.17	-0.4524	7	6	0.115

## Sheet: Figure 2- Source Data 5
Figure 2D: qPCR msl-2 expression
Graphed:
wMel wmk	wSuzi wmk	wBif wmk
0.00018271	0.00031955	0.00102557
0.00173035	0.00023415	0.00196005
0.00030998	0.00151744	0.00066949
0.00126601	0.00032271	0.00055211
0.00057716	0.00119059	0.00084746
0.00739817	0.00091937	0.00016436
0.00074767	0.00035999	0.00180672
0.00063943	0.00105477	0.00114981
0.00022605	0.00058095	0.00095418
0.00110484	0.00018769	0.00059394
0.0106416
Raw Data:
	Rp49 cq	msl-2 cq	2^-(deltaCt)
wMel wmk	18.1114	30.5296	0.000182712
	16.3903	25.565	0.00173035
	20.0195	31.6751	0.000309978
	25.0634	34.6889	0.00126601
	23.2889	34.0477	0.000577163
	18.7042	25.7828	0.00739817
	16.9783	27.3636	0.000747674
	21.0634	31.6743	0.00063943
	22.6667	34.7778	0.000226047
	25.256	35.0779	0.00110484
	27.6228	34.1769	0.0106416
wSuzi wmk	18.5552	30.1668	0.000319552
	18.1418	30.2021	0.000234146
	16.6331	25.9973	0.00151744
	21.234	32.8314	0.000322708
	20.9849	30.699	0.00119059
	23.4159	33.503	0.000919371
	23.7689	35.2087	0.000359989
	17.2049	27.0938	0.00105477
	20.2401	30.9894	0.000580946
	15.559	27.9384	0.000187693
wBif wmk	25.3826	35.3119	0.00102557
	23.1348	32.1297	0.00196005
	21.9836	32.5283	0.000669495
	19.5116	30.3344	0.000552109
	21.4652	31.6698	0.000847464
	19.3689	31.9397	0.000164364
	23.3434	32.4559	0.00180672
	23.0125	32.7769	0.00114981
	23.6627	33.6961	0.000954184
	23.0855	33.8029	0.000593943

## Sheet: Figure 2- Source Data 6
Figure 2D: qPCR for msl-2 expression: Statistical output of Kruskal-Wallis test
Number of families	1
Number of comparisons per family	3
Alpha	0.05
Dunn's multiple comparisons test	Mean rank diff.	Significant?	Summary	Adjusted P Value
wmk vs. wSuzi wmk	3.791	No	ns	>0.9999	A-B
wmk vs. wBif wmk	-0.4091	No	ns	>0.9999	A-C
wSuzi wmk vs. wBif wmk	-4.2	No	ns	0.9049	B-C
Test details	Mean rank 1	Mean rank 2	Mean rank diff.	n1	n2	Z
wmk vs. wSuzi wmk	17.09	13.3	3.791	11	10	0.9543
wmk vs. wBif wmk	17.09	17.5	-0.4091	11	10	0.103
wSuzi wmk vs. wBif wmk	13.3	17.5	-4.2	10	10	1.033

## Sheet: Figure 2- Source Data 7
Figure 2- figure supplement 1: Sex ratios alternative start codons
Graphed:
WT	Control gene	wMel wmk	5' wRec wmk	5' wSuzi wmk	WT	Control gene	wMel wmk	5' wRec wmk	5' wSuzi wmk
1	0.862069	0.608696	1.09677	1	0.95	0.882353	0.882353	1.125	0.783784
0.888889	1.08333	0.764706	1.4	0.846154	1	0.928571	1.35714	1.40909	0.875
0.736842	1.28	0.710526	1.1875	0.8	1.13636	1.1	1.05	1.03448	0.967742
0.85	0.875	0.733333	1.125	0.913043	0.833333	1.25	0.933333	1.2	1
	0.909091	0.585366		1.17857		0.823529	1.13043		0.833333
1	0.882353	0.571429	0.888889	1.21053	1.18182	0.826087	1.33333	1.04	1.12
1.23529	1.03571	0.666667	1.14286	0.636364	0.785714	1.13043	0.8	0.911765	0.8125
1.18182	1.22727	0.684211	1.3	0.928571	1.16	1.2	1	1.15	0.730769
1.07692	0.7	0.409091	1	0.833333	1.03846	1.19048	0.909091	1.31579	0.928571
0.818182	0.842105	0.588235		0.956522	1.04167	0.769231	0.947368		0.96
0.8125	0.769231	0.6875	0.71875	0.84	1.14286	0.764706	1.12	1	0.857143
1.16129	1.13636	0.56	1.03571	1.28571	1.23529	0.809524	0.909091	0.88	0.909091
1.06667	1.17391	0.555556	0.9	0.666667	0.8	0.863636	0.882353	0.888889	1.57895
0.84	0.793103		0.85	1.4	0.862069	1.16667		0.956522	0.884615
0.875	0.894737		1.14286		0.793103	1.36364		1.20833
0.894737	1.28571		0.6875		1	1.36842		1.2
1	1.16667		0.625		1	1		1.375
			0.8					1.13636
Raw Data
	wMel wmk
Vial	Act M	Act F	CyO M	CyO F	Act M/F	CyO M/F
1	14	23	15	17	0.608696	0.882353
2	13	17	19	14	0.764706	1.35714
3	27	38	21	20	0.710526	1.05
4	22	30	14	15	0.733333	0.933333
5	24	41	26	23	0.585366	1.13043
6	12	21	32	24	0.571429	1.33333
7	16	24	12	15	0.666667	0.8
8	13	19	25	25	0.684211	1
9	9	22	20	22	0.409091	0.909091
10	10	17	18	19	0.588235	0.947368
11	11	16	28	25	0.6875	1.12
12	14	25	30	33	0.56	0.909091
13	10	18	15	17	0.555556	0.882353
	Control Gene
Vial	Act M	Act F	CyO M	CyO F	Act M/F	CyO M/F
1	25	29	15	17	0.862069	0.882353
2	26	24	26	28	1.08333	0.928571
3	32	25	33	30	1.28	1.1
4	14	16	25	20	0.875	1.25
5	10	11	14	17	0.909091	0.823529
6	15	17	19	23	0.882353	0.826087
7	29	28	26	23	1.03571	1.13043
8	27	22	24	20	1.22727	1.2
9	14	20	25	21	0.7	1.19048
10	16	19	20	26	0.842105	0.769231
11	20	26	13	17	0.769231	0.764706
12	25	22	17	21	1.13636	0.809524
13	27	23	19	22	1.17391	0.863636
14	23	29	14	12	0.793103	1.16667
15	17	19	15	11	0.894737	1.36364
16	18	14	26	19	1.28571	1.36842
17	28	24	22	22	1.16667	1
	WT
Vial	Act M	Act F	CyO M	CyO F	Act M/F	CyO M/F
1	12	12	19	20	1	0.95
2	16	18	26	26	0.888889	1
3	14	19	25	22	0.736842	1.13636
4	17	20	15	18	0.85	0.833333
5	18	16	14	12	1.125	1.16667
6	19	19	13	11	1	1.18182
7	21	17	11	14	1.23529	0.785714
8	26	22	29	25	1.18182	1.16
9	28	26	27	26	1.07692	1.03846
10	27	33	25	24	0.818182	1.04167
11	26	32	32	28	0.8125	1.14286
12	36	31	21	17	1.16129	1.23529
13	32	30	12	15	1.06667	0.8
14	21	25	25	29	0.84	0.862069
15	14	16	23	29	0.875	0.793103
16	17	19	32	32	0.894737	1
17	19	19	15	15	1	1
	5' wRec wmk
Vial	Act M	Act F	CyO M	CyO F	Act M/F	CyO M/F
1	34	31	27	24	1.09677	1.125
2	42	30	31	22	1.4	1.40909
3	19	16	30	29	1.1875	1.03448
4	27	24	30	25	1.125	1.2
5
6	16	18	26	25	0.888889	1.04
7	16	14	31	34	1.14286	0.911765
8	13	10	23	20	1.3	1.15
9	23	23	25	19	1	1.31579
10
11	23	32	26	26	0.71875	1
12	29	28	22	25	1.03571	0.88
13	18	20	16	18	0.9	0.888889
14	17	20	22	23	0.85	0.956522
15	24	21	29	24	1.14286	1.20833
16	11	16	24	20	0.6875	1.2
17	15	24	22	16	0.625	1.375
18	20	25	25	22	0.8	1.13636
	Act x 5' wSuzi
Vial	Act M	Act F	CyO M	CyO F	Act M/F	CyO M/F
1	23	23	29	37	1	0.783784
2	33	39	28	32	0.846154	0.875
3	24	30	30	31	0.8	0.967742
4	21	23	32	32	0.913043	1
5	33	28	25	30	1.17857	0.833333
6	23	19	28	25	1.21053	1.12
7	21	33	26	32	0.636364	0.8125
8	13	14	19	26	0.928571	0.730769
9	5	6	13	14	0.833333	0.928571
10	22	23	24	25	0.956522	0.96
11	21	25	24	28	0.84	0.857143
12	18	14	20	22	1.28571	0.909091
13	20	30	30	19	0.666667	1.57895
14	14	10	23	26	1.4	0.884615

## Sheet: Figure 2- Source Data 8
Figure 2- Figure supplement 1: Sex ratios of transgenes with 5' alternative start codon: Statistical output of Kruskal-Wallis test
Number of families	1
Number of comparisons per family	15
Alpha	0.05
Dunn's multiple comparisons test	Mean rank diff.	Significant?	Summary	Adjusted P Value
WT vs. Control gene	-2.535	No	ns	>0.9999	A-B
WT vs. wmk	42.71	Yes	***	0.0002	A-C
WT vs. 5' wRec wmk	-2	No	ns	>0.9999	A-D
WT vs. 5' wSuzi wmk	2.121	No	ns	>0.9999	A-E
WT vs. 5' wSuzi wmk	4.763	No	ns	>0.9999	A-J
Control gene vs. wmk	45.25	Yes	****	<0.0001	B-C
Control gene vs. 5' wRec wmk	0.5349	No	ns	>0.9999	B-D
Control gene vs. 5' wSuzi wmk	4.655	No	ns	>0.9999	B-E
Control gene vs. 5' wSuzi wmk	7.298	No	ns	>0.9999	B-J
wmk vs. 5' wRec wmk	-44.71	Yes	****	<0.0001	C-D
wmk vs. 5' wSuzi wmk	-40.59	Yes	***	0.0008	C-E
wmk vs. 5' wSuzi wmk	-37.95	Yes	**	0.0024	C-J
5' wRec wmk vs. 5' wSuzi wmk	4.121	No	ns	>0.9999	D-E
5' wRec wmk vs. 5' wSuzi wmk	6.763	No	ns	>0.9999	D-J
5' wSuzi wmk vs. 5' wSuzi wmk	2.643	No	ns	>0.9999	E-J
Test details	Mean rank 1	Mean rank 2	Mean rank diff.	n1	n2	Z
WT vs. Control gene	51.91	54.44	-2.535	16	17	0.2786
WT vs. wmk	51.91	9.192	42.71	16	13	4.38
WT vs. 5' wRec wmk	51.91	53.91	-2	16	16	0.2166
WT vs. 5' wSuzi wmk	51.91	49.79	2.121	16	14	0.2218
WT vs. 5' wSuzi wmk	51.91	47.14	4.763	16	14	0.4983
Control gene vs. wmk	54.44	9.192	45.25	17	13	4.702
Control gene vs. 5' wRec wmk	54.44	53.91	0.5349	17	16	0.0588
Control gene vs. 5' wSuzi wmk	54.44	49.79	4.655	17	14	0.4939
Control gene vs. 5' wSuzi wmk	54.44	47.14	7.298	17	14	0.7742
wmk vs. 5' wRec wmk	9.192	53.91	-44.71	13	16	4.585
wmk vs. 5' wSuzi wmk	9.192	49.79	-40.59	13	14	4.035
wmk vs. 5' wSuzi wmk	9.192	47.14	-37.95	13	14	3.772
5' wRec wmk vs. 5' wSuzi wmk	53.91	49.79	4.121	16	14	0.4311
5' wRec wmk vs. 5' wSuzi wmk	53.91	47.14	6.763	16	14	0.7076
5' wSuzi wmk vs. 5' wSuzi wmk	49.79	47.14	2.643	14	14	0.2677

## Sheet: Figure 3- Source Data 1
Figure 3: Sex ratios divergent homologs
Graphed:
WT	Control gene	wMel wmk	wBol1b wmk	wBif wmk	wCaub wmk	wInn/wBor wmk		WT	Control gene	wMel wmk	wBol1b wmk	wBif wmk	wCaub wmk	wInn/wBor wmk
1	1.22222	0.722222	0.794118	0.833333	0.909091	0.909091		1.2069	0.869565	0.925926	0.868421	1.2069	0.789474	1.125
1.04167	0.692308	0.5	1.375	1.11111		0.882353		1.17391	0.833333	0.75	1.08333	0.789474		1
	0.884615		0.727273	0.777778	0.933333	0.882353			0.894737		1.2	0.954545	1.1875	0.916667
0.857143	0.789474		0.833333	1.03333		0.8		0.8	1		0.578947	1		1.2
1.0625	1.03571	0.875	1.57143	1.07692	1	0.8		1	1.52941	1.26667	1.28571	0.846154	0.882353	1.5
1.13333	1.04167	0.695652	1.23529	1.04167	2	1.5		0.896552	0.722222	0.823529	1	0.769231	1.4	1.09524
0.8125	0.833333	0.722222	0.846154	1	1.2	1		1	1.05263	0.666667	1	0.933333	1.38462	1.13333
	0.73913	0.647059	0.90625	1.0625	0.823529	1.03704			1	1.0625	1.53333	1.125	0.9375	1.05882
0.769231	0.68		0.909091	1.125	1.41667	0.954545		0.666667	1.35714		1.27273	0.833333	1.23077	1.35294
0.9375	1.27273		1.09091	1.11111	0.65	1.0625		1.2	0.823529		0.555556	1.18182	0.73913	1.42857
0.916667	0.806452	0.363636	0.625	1		0.761905		1.375	0.782609	0.906977	0.857143	1.33333		0.95
0.714286	0.772727			0.931034	1.5	1.35294		1	0.933333			0.857143	0.625	1.14286
0.833333	1.08	0.619048	1.33333	1.23529		1.26316		1.07143	0.857143	0.954545	1.36364	1.36364		0.8
1.0625	1.08333	0.733333	1.92857			1		1	0.954545	0.923077	0.884615			1.4
1.11111	1	0.5	1.35		1.2	0.965517		0.818182	0.785714	1.23077	1.33333		1.71429	0.884615
1	1	0.538462	0.909091			1.33333		1.5	0.708333	0.8	0.764706			0.941176
1	0.717949	0.5	1.04348					1.18182	1	0.692308	1.36364
1.0625	1.11765							0.947368	1.14286
Raw Data:
			wMel wmk
Vials	Act M	Act F	CyO M	CyO F	sum	Act M/F	CyO M/F
1	13	18	25	27	83	0.722222	0.925926
2	5	10	18	24	57	0.5	0.75
3	12	14	10	10	46
4	5	16	12	14	47
5	14	16	19	15	64	0.875	1.26667
6	16	23	14	17	70	0.695652	0.823529
7	13	18	12	18	61	0.722222	0.666667
8	11	17	17	16	61	0.647059	1.0625
9	9	10	15	13	47
10	4	13	15	10	42
11	4	11	39	43	97	0.363636	0.906977
12	6	13	12	17	48
13	13	21	21	22	77	0.619048	0.954545
14	11	15	12	13	51	0.733333	0.923077
15	9	18	16	13	56	0.5	1.23077
16	7	13	20	25	65	0.538462	0.8
17	5	10	18	26	59	0.5	0.692308
18
19
20
			WT
Vials	Act M	Act F	CyO M	CyO F	sum	Act M/F	CyO M/F
1	16	16	35	29	96	1	1.2069
2	25	24	27	23	99	1.04167	1.17391
3	7	11	8	10	36
4	18	21	20	25	84	0.857143	0.8
5	17	16	20	20	73	1.0625	1
6	17	15	26	29	87	1.13333	0.896552
7	13	16	12	12	53	0.8125	1
8	7	11	10	13	41
9	10	13	16	24	63	0.769231	0.666667
10	15	16	18	15	64	0.9375	1.2
11	22	24	11	8	65	0.916667	1.375
12	10	14	14	14	52	0.714286	1
13	15	18	15	14	62	0.833333	1.07143
14	17	16	10	10	53	1.0625	1
15	10	9	18	22	59	1.11111	0.818182
16	16	16	15	10	57	1	1.5
17	21	21	13	11	66	1	1.18182
18	17	16	18	19	70	1.0625	0.947368
19
20
			wBol
Vials	Act M	Act F	CyO M	CyO F	sum	Act M/F	CyO M/F
1	27	34	33	38	132	0.794118	0.868421
2	33	24	26	24	107	1.375	1.08333
3	8	11	18	15	52	0.727273	1.2
4	15	18	11	19	63	0.833333	0.578947
5	22	14	18	14	68	1.57143	1.28571
6	21	17	15	15	68	1.23529	1
7	11	13	15	15	54	0.846154	1
8	29	32	23	15	99	0.90625	1.53333
9	30	33	28	22	113	0.909091	1.27273
10	12	11	10	18	51	1.09091	0.555556
11	10	16	12	14	52	0.625	0.857143
12	2	0	0	2	4
13	16	12	15	11	54	1.33333	1.36364
14	27	14	23	26	90	1.92857	0.884615
15	27	20	20	15	82	1.35	1.33333
16	10	11	13	17	51	0.909091	0.764706
17	24	23	15	11	73	1.04348	1.36364
18
19
20
			Control Gene
Vials	Act M	Act F	CyO M	CyO F	sum	Act M/F	CyO M/F
1	22	18	20	23	83	1.22222	0.869565
2	18	26	15	18	77	0.692308	0.833333
3	23	26	17	19	85	0.884615	0.894737
4	15	19	13	13	60	0.789474	1
5	29	28	26	17	100	1.03571	1.52941
6	25	24	13	18	80	1.04167	0.722222
7	20	24	20	19	83	0.833333	1.05263
8	17	23	20	20	80	0.73913	1
9	17	25	19	14	75	0.68	1.35714
10	14	11	14	17	56	1.27273	0.823529
11	25	31	18	23	97	0.806452	0.782609
12	17	22	28	30	97	0.772727	0.933333
13	27	25	12	14	78	1.08	0.857143
14	26	24	21	22	93	1.08333	0.954545
15	22	22	11	14	69	1	0.785714
16	27	27	17	24	95	1	0.708333
17	28	39	27	27	121	0.717949	1
18	19	17	16	14	66	1.11765	1.14286
19
20
			wBif
Vials	Act M	Act F	CyO M	CyO F	sum	Act M/F	CyO M/F
1	25	30	35	29	119	0.833333	1.2069
2	20	18	15	19	72	1.11111	0.789474
3	21	27	21	22	91	0.777778	0.954545
4	31	30	23	23	107	1.03333	1
5	14	13	11	13	51	1.07692	0.846154
6	25	24	20	26	95	1.04167	0.769231
7	15	15	14	15	59	1	0.933333
8	17	16	18	16	67	1.0625	1.125
9	18	16	10	12	56	1.125	0.833333
10	20	18	13	11	62	1.11111	1.18182
11	21	21	20	15	77	1	1.33333
12	27	29	12	14	82	0.931034	0.857143
13	21	17	15	11	64	1.23529	1.36364
14
15
16
17
18
19
20
			wCaub
Vials	Act M	Act F	CyO M	CyO F	sum	Act M/F	CyO M/F
1	10	11	15	19	55	0.909091	0.789474
2	11	12	12	7	42
3	14	15	19	16	64	0.933333	1.1875
4	8	13	10	10	41
5	14	14	15	17	60	1	0.882353
6	20	10	14	10	54	2	1.4
7	18	15	18	13	64	1.2	1.38462
8	14	17	15	16	62	0.823529	0.9375
9	17	12	16	13	58	1.41667	1.23077
10	13	20	17	23	73	0.65	0.73913
11	11	15	10	12	48
12	15	10	10	16	51	1.5	0.625
13	11	14	13	11	49
14	12	12	12	9	45
15	18	15	12	7	52	1.2	1.71429
16
17
18
19
20
			wInn
Vials	Act M	Act F	CyO M	CyO F	sum	Act M/F	CyO M/F
1	20	22	18	16	76	0.909091	1.125
2	15	17	16	16	64	0.882353	1
3	15	17	11	12	55	0.882353	0.916667
4	8	10	18	15	51	0.8	1.2
5	12	15	15	10	52	0.8	1.5
6	18	12	23	21	74	1.5	1.09524
7	12	12	17	15	56	1	1.13333
8	28	27	18	17	90	1.03704	1.05882
9	21	22	23	17	83	0.954545	1.35294
10	17	16	10	7	50	1.0625	1.42857
11	16	21	19	20	76	0.761905	0.95
12	23	17	24	21	85	1.35294	1.14286
13	24	19	16	20	79	1.26316	0.8
14	22	22	14	10	68	1	1.4
15	28	29	23	26	106	0.965517	0.884615
16	16	12	16	17	61	1.33333	0.941176
17
18
19
20

## Sheet: Figure 3- Source Data 2
Figure 3: Sex ratios of divergent homologs: Statistical output of Kruskal-Wallis test
Number of families	1
Number of comparisons per family	21
Alpha	0.05
Dunn's multiple comparisons test	Mean rank diff.	Significant?	Summary	Adjusted P Value
WT vs. Control gene	5.063	No	ns	>0.9999	A-B
WT vs. wmk	41.73	Yes	**	0.004	A-C
WT vs. wBol1b	-7.406	No	ns	>0.9999	A-D
WT vs. wBif	-10.46	No	ns	>0.9999	A-E
WT vs. wCaub	-12.74	No	ns	>0.9999	A-F
WT vs. wInn	-4.844	No	ns	>0.9999	A-G
Control gene vs. wmk	36.67	Yes	*	0.0164	B-C
Control gene vs. wBol1b	-12.47	No	ns	>0.9999	B-D
Control gene vs. wBif	-15.52	No	ns	>0.9999	B-E
Control gene vs. wCaub	-17.8	No	ns	>0.9999	B-F
Control gene vs. wInn	-9.906	No	ns	>0.9999	B-G
wmk vs. wBol1b	-49.14	Yes	***	0.0002	C-D
wmk vs. wBif	-52.19	Yes	***	0.0002	C-E
wmk vs. wCaub	-54.47	Yes	***	0.0003	C-F
wmk vs. wInn	-46.57	Yes	***	0.0007	C-G
wBol1b vs. wBif	-3.05	No	ns	>0.9999	D-E
wBol1b vs. wCaub	-5.331	No	ns	>0.9999	D-F
wBol1b vs. wInn	2.563	No	ns	>0.9999	D-G
wBif vs. wCaub	-2.281	No	ns	>0.9999	E-F
wBif vs. wInn	5.613	No	ns	>0.9999	E-G
wCaub vs. wInn	7.894	No	ns	>0.9999	F-G
Test details	Mean rank 1	Mean rank 2	Mean rank diff.	n1	n2	Z
WT vs. Control gene	52.31	47.25	5.063	16	18	0.5032
WT vs. wmk	52.31	10.58	41.73	16	12	3.732
WT vs. wBol1b	52.31	59.72	-7.406	16	16	0.7154
WT vs. wBif	52.31	62.77	-10.46	16	13	0.9564
WT vs. wCaub	52.31	65.05	-12.74	16	10	1.079
WT vs. wInn	52.31	57.16	-4.844	16	16	0.4679
Control gene vs. wmk	47.25	10.58	36.67	18	12	3.36
Control gene vs. wBol1b	47.25	59.72	-12.47	18	16	1.239
Control gene vs. wBif	47.25	62.77	-15.52	18	13	1.456
Control gene vs. wCaub	47.25	65.05	-17.8	18	10	1.541
Control gene vs. wInn	47.25	57.16	-9.906	18	16	0.9846
wmk vs. wBol1b	10.58	59.72	-49.14	12	16	4.394
wmk vs. wBif	10.58	62.77	-52.19	12	13	4.452
wmk vs. wCaub	10.58	65.05	-54.47	12	10	4.344
wmk vs. wInn	10.58	57.16	-46.57	12	16	4.165
wBol1b vs. wBif	59.72	62.77	-3.05	16	13	0.279
wBol1b vs. wCaub	59.72	65.05	-5.331	16	10	0.4517
wBol1b vs. wInn	59.72	57.16	2.563	16	16	0.2475
wBif vs. wCaub	62.77	65.05	-2.281	13	10	0.1852
wBif vs. wInn	62.77	57.16	5.613	13	16	0.5134
wCaub vs. wInn	65.05	57.16	7.894	10	16	0.6688

[truncated: 4 more sheets: Figure 4- Source Data 1, Figure 4- Source Data 2, Figure 4- Source Data 3, Figure 4- Source Data 4]
